# Supplementary material for: CuII–hydrotalcite catalyzed one-pot three component synthesis of 2H-indazoles by consecutive condensation, C–N and N–N bond formations
Source: Royal Society of Chemistry journal article supplement (doi:10.1039/c2cy20590d), 2012-10-16

# **Cu<sup>II</sup>–hydrotalcite catalyzed one–pot three component synthesis of 2*H*-indazoles by consecutive condensation, C–N and N–N bond formations**

**Avvari N. Prasad, Rapelli Srinivas and Benjaram M. Reddy\***

*Inorganic and Physical Chemistry Division, CSIR - Indian Institute of Chemical Technology,*

*Uppal Road, Hyderabad – 500 607, India*

## **Supporting Information**

### **List of Contents**

1. Characterization techniques of Cu<sup>II</sup>–hydrotalcite (Cu<sup>II</sup>–HT) catalysts
2. Recyclability of the Cu<sup>II</sup>–HT catalyst
3. General information
4. <sup>1</sup>H NMR, <sup>13</sup>C NMR, FTIR and MS data of isolated compounds
5. <sup>1</sup>H NMR and <sup>13</sup>C NMR spectra of isolated compounds

**1. Characterization techniques of Cu<sup>II</sup>-hydrotalcite (Cu<sup>II</sup>-HT) catalysts:** The X-ray powder diffraction (XRD) patterns of the prepared catalysts were acquired with a Siemens D-5005 diffractometer using a Ni-filtered Cu-K $\alpha$  radiation (0.15418 nm) source and a Scintillation counter detector. From XRD, we observed typical reflection peaks at  $2\theta = 11.7, 23.6, 34.6, 35.6, 37.7, 40.4$  and  $53.31$  which are almost identical to the characteristic peaks of the hydrotalcite phase (JCPDC # 460099). The FTIR spectra were recorded on a Nicolet 740 FT-IR spectrometer at ambient conditions, using KBr disks, with a nominal resolution of  $4\text{ cm}^{-1}$  and an average of 100 spectra. From FTIR, we observed the intense absorption bands at around  $1,350\text{--}1,410$  and  $800\text{--}890\text{ cm}^{-1}$  due to symmetric stretching ( $\nu_3$ ) and out-of-plane deformation vibrations ( $\nu_2$ ) of the interlayer carbonate anions, respectively, and broad band at  $\sim 3450\text{ cm}^{-1}$  is due to OH<sup>-</sup> stretching vibration of *brucite-like* layers caused by the interlayer water molecules and the hydroxyl groups of the layers. The absorption band at around  $445\text{ cm}^{-1}$  ( $\delta\text{ O-M-O}$ ) is ascribed to the lattice vibrations of the octahedral sheets of the hydrotalcites.

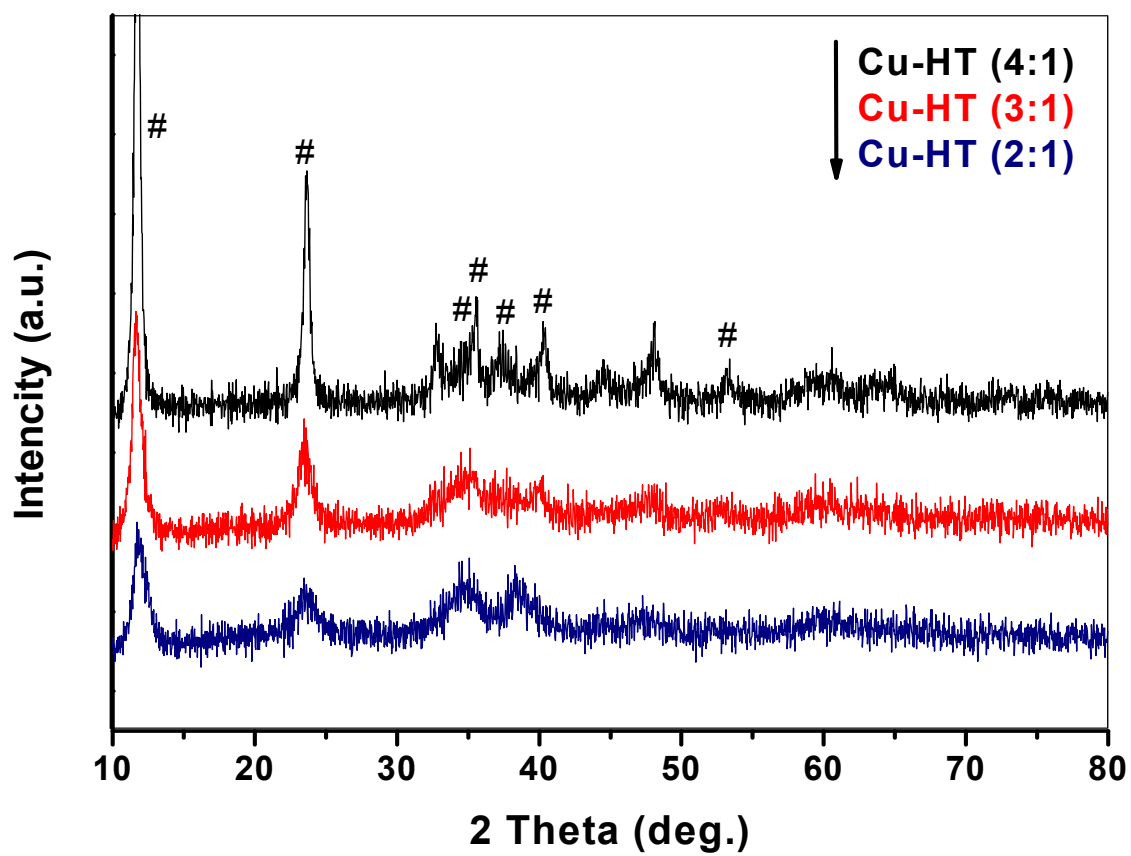

**Figure 1.** Powder X-ray diffraction patterns of the  $\text{Cu}^{\text{II}}$ -HT materials.

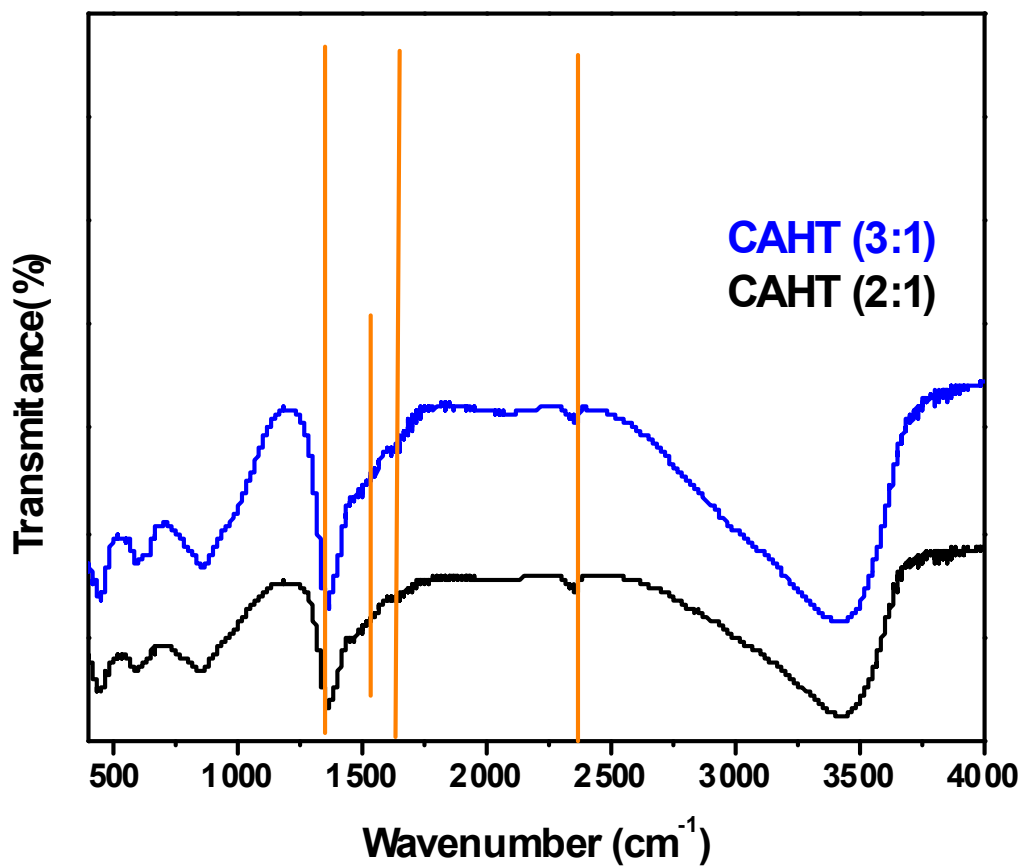

**Figure 2.** FT-IR spectra of Cu<sup>II</sup>-HT materials.

**2. Recyclability of the Cu<sup>II</sup>-HT catalyst:** We carried out catalyst-recycling experiments by using 2-bromobenzaldehyde, aniline and sodium azide as the model reaction. Remarkably, the used Cu<sup>II</sup>-HT catalyst exhibited without any significant loss of activity and selectivity in terms of desired product (*2H*-indazole) up to three cycles.

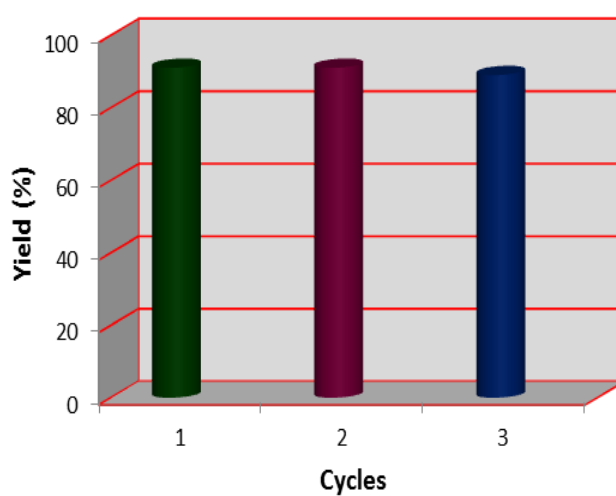

**Figure 3.** Recycling of Cu<sup>II</sup>-HT catalyst for the reaction between 2-bromobenzaldehyde, aniline and sodium azide.

**3. General information:**  $^1\text{H}$  and  $^{13}\text{C}$  NMR spectra were recorded on a Varian VXR-Unity 200 MHz, Bruker UXNMR/XWIN-NMR Avance-300 MHz, and GEMINI spectrometer. Chemical shifts ( $\delta$ ) are given in parts per million (ppm) relative to tetramethylsilane (TMS), which is used as an internal standard, and coupling constants ( $J$ ) are reported in hertz (Hz). Splitting patterns of proton are described as s, d, dd, t, q, br s and m stand for the resonance multiplicities singlet, doublet, doublet of doublet, triplet, quartet, broad singlet and multiplet, respectively. Only the most important IR absorptions ( $\text{cm}^{-1}$ ) and the molecular ions and/or base peaks in MS are given.

#### 4. $^1\text{H}$ NMR, $^{13}\text{C}$ NMR, FTIR and MS data of isolated compounds:

**Table 2, Entry 1: 2-Phenyl-2*H*-indazole:**

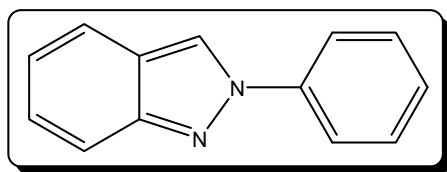

$^1\text{H}$  NMR ( $\text{CDCl}_3$ ):  $\delta$  8.38 (s, 1H), 7.92-7.88 (m, 3H), 7.77-7.73 (m, 1H), 7.67-7.63 (m, 1H), 7.53-7.48 (m, 2H), 7.40-7.30 (m, 1H), 7.10-7.05 (m, 1H);  $^{13}\text{C}$  NMR ( $\text{CDCl}_3$ ):  $\delta$  149.8, 140.5, 129.6, 127.9, 126.8, 122.4, 121.0, 120.5, 120.4, 117.9, 116.9; IR (KBr)  $\nu$  1628, 1518, 1497, 1385, 1317, 1204, 1046, 950, 908, 752, 686  $\text{cm}^{-1}$ ; MS (EI)  $m/z$ : 195 [ $\text{M}^+$ +1].

**Table 2, Entry 2: 2-(Pyridine-3-yl)-2*H*-indazole:**

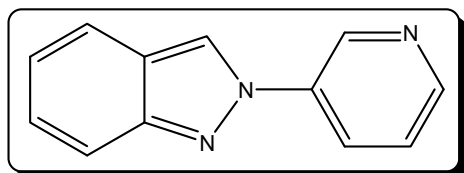

$^1\text{H}$  NMR ( $\text{CDCl}_3$ ):  $\delta$  9.11 (s, 1H), 8.56-8.48 (m, 1H), 8.33-8.25 (m, 1H), 7.96-7.87 (m, 1H), 7.77-7.72 (m, 2H), 7.36-7.28 (m, 2H), 7.13-7.08 (m, 1H);  $^{13}\text{C}$  NMR ( $\text{CDCl}_3$ ):  $\delta$  150.2, 148.2, 138.8, 127.5, 122.7, 122.6, 122.1, 120.5, 117.9, 114.0; IR (KBr)  $\nu$  1612, 1520, 1475, 1437, 1382, 1203, 1145, 1059, 909, 780, 731  $\text{cm}^{-1}$ ; MS (EI)  $m/z$ : 196 [ $\text{M}^+$ +1].

**Table 2, Entry 3: 2-(3,4-Dimethylphenyl)-2*H*-indazole:**

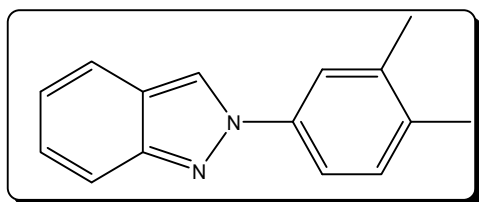

$^1\text{H}$  NMR ( $\text{CDCl}_3$ ):  $\delta$  8.37 (s, 1H), 7.79 (d,  $J = 8.68$  Hz, 1H), 7.70 (d,  $J = 8.49$  Hz, 2H), 7.59-7.56 (m, 1H), 7.34-7.27 (m, 2H), 7.13-7.08 (m, 1H), 2.36 (s, 3H), 2.32 (s, 3H);  $^{13}\text{C}$  NMR ( $\text{CDCl}_3$ ):  $\delta$  149.5, 138.3, 138.0, 136.5, 130.4, 126.5, 122.1, 122.0, 120.2, 118.0, 117.7, 19.8, 19.3; IR (KBr)  $\nu$  2919, 2860, 1617, 1512, 1458, 1381, 1340, 1138, 1056, 967, 883, 811, 752, 562  $\text{cm}^{-1}$ ; MS (ESI)  $m/z$ : 223 [ $\text{M}^+$ +1].

**Table 2, Entry 4: 2-*p*-Tolyl-2*H*-indazole:**

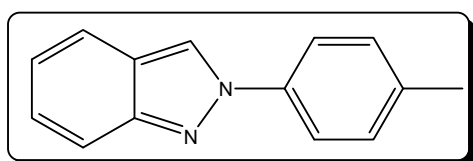

$^1\text{H}$  NMR ( $\text{CDCl}_3$ ):  $\delta$  8.37 (s, 1H), 7.79-7.69 (m, 4H), 7.33-7.26 (m, 3H), 7.13-7.08 (m, 1H), 2.42 (s, 3H);  $^{13}\text{C}$  NMR ( $\text{CDCl}_3$ ):  $\delta$  149.5, 137.8, 130.0, 129.5,

126.6, 122.6, 122.2, 120.7, 120.2, 119.7, 117.7, 20.9; IR (KBr)  $\nu$  2922, 2858, 1626, 1522, 1384, 1313, 1204, 1118, 1046, 908, 816, 782, 730, 508  $\text{cm}^{-1}$ ; MS (ESI)  $m/z$ : 209 [ $\text{M}^+ + 1$ ].

**Table 2, Entry 5: 2-(4-Methoxy-2-nitrophenyl)-2H-indazole:**

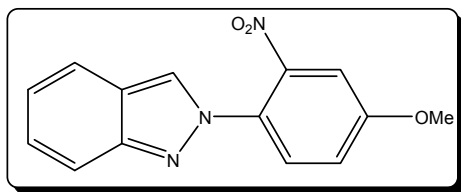

$^1\text{H}$  NMR ( $\text{CDCl}_3$ ):  $\delta$  8.91 (d,  $J = 9.82$  Hz, 1H), 8.00-7.96 (m, 2H), 7.75-7.72 (m, 1H), 7.60-7.50 (m, 3H), 7.33-7.28 (m, 1H), 3.89 (s, 3H);  $^{13}\text{C}$  NMR ( $\text{CDCl}_3$ ):  $\delta$  178.3, 165.9, 155.3, 132.5, 129.1, 129.0, 127.3, 125.5,

124.0, 123.7, 120.2, 108.9, 108.6, 55.9; IR (KBr)  $\nu$  2923, 2853, 1686, 1516, 1459, 1343, 1278, 1039, 757, 697  $\text{cm}^{-1}$ ; MS (ESI)  $m/z$ : 271 [ $\text{M}^+ + 2$ ].

**Table 2, Entry 6: 2-(4-Methoxyphenyl)-2H-indazole:**

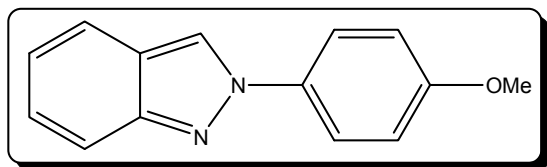

$^1\text{H}$  NMR ( $\text{CDCl}_3$ ):  $\delta$  8.37 (s, 1H), 7.84 (t,  $J = 9.00$  Hz, 3H), 7.75 (d,  $J = 8.00$  Hz, 1H), 7.36 (t,  $J = 9.00$  Hz, 1H), 7.15 (t,  $J = 8.00$  Hz, 1H), 7.08 (d,  $J = 9.00$  Hz, 2H), 3.92 (s, 3H);  $^{13}\text{C}$  NMR

( $\text{CDCl}_3$ ):  $\delta$  159.2, 149.2, 134.0, 126.5, 122.6, 122.3, 122.1, 120.2, 117.7, 114.5, 55.5; IR (KBr)  $\nu$  2924, 2854, 1597, 1500, 1462, 1252, 1148, 1024, 842, 740, 550  $\text{cm}^{-1}$ ; MS (ESI)  $m/z$ : 225 [ $\text{M}^+ + 1$ ].

**Table 2, Entry 7: 2-(2-Chlorophenyl)-2H-indazole:**

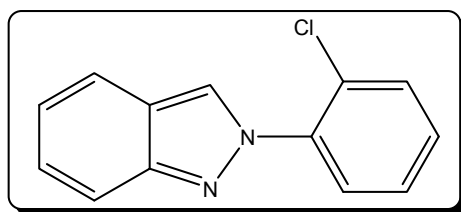

$^1\text{H}$  NMR ( $\text{CDCl}_3$ ):  $\delta$  8.34 (s, 1H), 7.80-7.76 (m, 1H), 7.71-7.67 (m, 1H), 7.60-7.57 (m, 1H), 7.50-7.42 (m, 3H), 7.32-7.28 (m, 1H), 7.18-7.12 (m, 1H);  $^{13}\text{C}$  NMR

( $\text{CDCl}_3$ ):  $\delta$  148.3, 146.0, 139.0, 135.1, 130.6, 129.9, 128.5, 127.7, 126.9, 125.2, 122.4, 120.5, 117.9; IR (KBr)  $\nu$  1628, 1518, 1484, 1385, 1193, 1060, 953, 757, 611, 537  $\text{cm}^{-1}$ ; MS (ESI)  $m/z$ : 229 [ $\text{M}^+$ ].



**Table 2, Entry 8: 2-(4-Bromophenyl)-2H-indazole:**

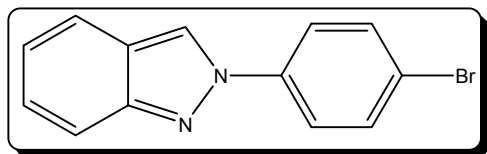

$^1\text{H}$  NMR ( $\text{CDCl}_3$ ):  $\delta$  8.37 (s, 1H), 7.81-7.77 (m, 4H), 7.74-7.62 (m, 4H);  $^{13}\text{C}$  NMR ( $\text{CDCl}_3$ ):  $\delta$  149.8, 139.4, 132.6, 127.1, 122.8, 122.7, 122.2, 121.4, 120.3, 120.2, 117.8; IR (KBr)  $\nu$  2926, 2856, 1631, 1591, 1492, 1384, 1304, 1203, 1072, 1007, 952, 909, 817, 752  $\text{cm}^{-1}$ ; MS (ESI)  $m/z$ : 273 [ $\text{M}^++1$ ].

**Table 2, Entry 9: 5-Fluoro-2-(3,4-dimethylphenyl)-2H-indazole:**

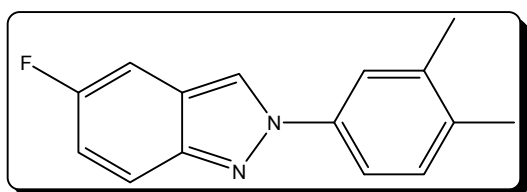

$^1\text{H}$  NMR ( $\text{CDCl}_3$ ):  $\delta$  8.32 (s, 1H), 7.77-7.74 (m, 1H), 7.70-7.67 (m, 1H), 7.57-7.52 (m, 2H), 7.27-7.24 (m, 2H), 7.13-7.09 (m, 1H), 2.36 (s, 3H), 2.33 (s, 3H);  $^{13}\text{C}$  NMR ( $\text{CDCl}_3$ ):  $\delta$  160.1, 156.9, 138.1, 136.7, 130.4, 121.9, 120.4, 120.2, 119.8, 119.7, 118.3, 117.9, 19.8, 19.3; IR (KBr)  $\nu$  2924, 2855, 1640, 1522, 1457, 1382, 1230, 1171, 964, 806, 732  $\text{cm}^{-1}$ ; MS (ESI)  $m/z$ : 241 [ $\text{M}^++1$ ].

**Table 2, Entry 10: 2-(2-Methoxy-4-methylphenyl)-2H-indazole:**

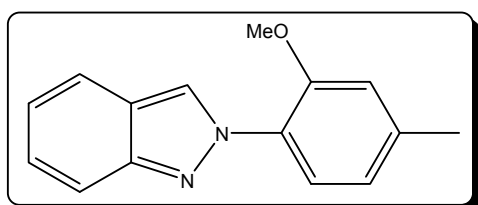

$^1\text{H}$  NMR ( $\text{CDCl}_3$ ):  $\delta$  8.52 (s, 1H), 7.79-7.70 (m, 2H), 7.39-7.28 (m, 1H), 7.22-7.17 (m, 1H), 7.13-7.06 (m, 1H), 7.03-6.98 (m, 1H), 3.87 (s, 3H), 2.37 (s, 3H);  $^{13}\text{C}$  NMR ( $\text{CDCl}_3$ ):  $\delta$  156.8, 148.6, 135.6, 130.8, 129.5, 126.9, 126.8, 126.4, 125.5, 121.7, 120.4, 117.5, 112.3, 56.1, 20.3; IR (KBr)  $\nu$  2925, 2853, 1689, 1514, 1460, 1383, 1251, 1141, 1026, 911, 803, 735, 608  $\text{cm}^{-1}$ ; MS (ESI)  $m/z$ : 239 [ $\text{M}^++1$ ].

**Table 2, Entry 11: 5-Fluoro-2-phenyl-2H-indazole:**

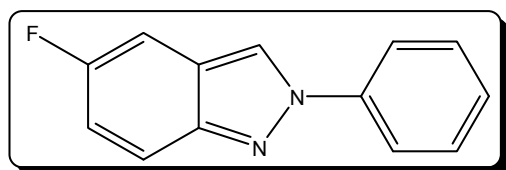

$^1\text{H}$  NMR ( $\text{CDCl}_3$ ):  $\delta$  8.37 (s, 1H), 7.89-7.87 (d,  $J$  = 7.72 Hz, 2H), 7.78-7.75 (m, 1H), 7.53 (t,  $J$  = 7.72 Hz, 2H), 7.41 (t,  $J$  = 7.72 Hz, 1H), 7.29-7.26 (m, 1H), 7.15-7.11 (m, 1H);  $^{13}\text{C}$  NMR ( $\text{CDCl}_3$ ):  $\delta$

157.0, 147.1, 140.3, 129.5, 128.0, 120.8, 120.4, 120.0, 119.9, 118.6, 118.2, 102.7, 102.4; IR (KBr)  $\nu$  1682, 1526, 1374, 1214, 1149, 1079, 907, 732, 650  $\text{cm}^{-1}$ ; MS (ESI)  $m/z$ : 213  $[\text{M}^++1]$ .

**Table 2, Entry 12: 5-Fluoro-2-adamantyl-2H-indazole:**

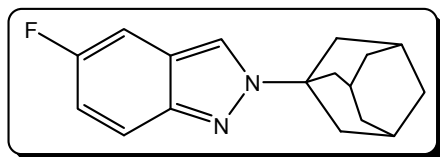

$^1\text{H}$  NMR ( $\text{CDCl}_3$ ):  $\delta$  7.99 (s, 1H), 7.71-7.68 (m, 1H), 7.24-7.21 (m, 1H), 7.07-7.03 (m, 1H), 2.32-2.27 (m, 9H), 1.82-1.80 (m, 6H);  $^{13}\text{C}$  NMR ( $\text{CDCl}_3$ ):  $\delta$  145.4, 119.4, 119.3, 118.6, 118.5, 117.0, 116.6, 60.4, 43.1, 36.0, 29.5; IR (KBr)  $\nu$  2917, 2854, 1516, 1455, 1373, 1310, 1163, 857, 808, 766, 730  $\text{cm}^{-1}$ ; MS (ESI)  $m/z$ : 271  $[\text{M}^++1]$ .

**Table 2, Entry 13: 2-Adamantyl-2H-indazole:**

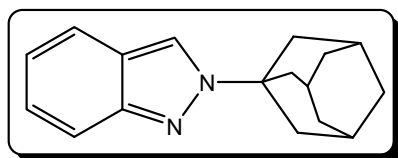

$^1\text{H}$  NMR ( $\text{CDCl}_3$ ):  $\delta$  8.05 (s, 1H), 7.75 (d,  $J = 8.39$  Hz, 1H), 7.66 (d,  $J = 8.39$  Hz, 1H), 7.26 (t,  $J = 8.39$  Hz, 1H), 7.05 (t,  $J = 8.39$  Hz, 1H), 2.34-2.28 (m, 9H), 1.83-1.80 (m, 6H);  $^{13}\text{C}$  NMR ( $\text{CDCl}_3$ ):  $\delta$  148.0, 125.4, 121.0, 120.9, 120.1, 118.4, 117.4, 60.1, 43.1, 36.0, 29.5; IR (KBr)  $\nu$  2915, 2856, 1652, 1513, 1454, 1385, 1309, 1149, 1052, 908, 730, 647  $\text{cm}^{-1}$ ; MS (ESI)  $m/z$ : 253  $[\text{M}^++1]$ .

**Table 2, Entry 14: 2-(4-Bromo-2,6-dimethylphenyl)-2H-indazole:**

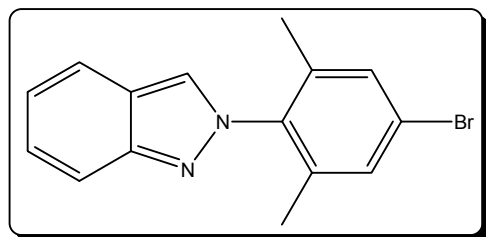

$^1\text{H}$  NMR ( $\text{CDCl}_3$ ):  $\delta$  8.58 (s, 1H), 8.25-8.21 (m, 1H), 7.64-7.60 (m, 1H), 7.46-7.32 (m, 2H), 7.24-7.20 (m, 2H), 2.13 (s, 6H);  $^{13}\text{C}$  NMR ( $\text{CDCl}_3$ ):  $\delta$  162.6, 149.9, 134.3, 133.2, 132.6, 131.6, 130.6, 129.2, 128.6, 127.7, 125.8, 116.6, 18.1; IR (KBr)  $\nu$  2924, 2855, 1726, 1463, 1279, 1186, 1079, 967, 746, 606, 543  $\text{cm}^{-1}$ ; MS (ESI)  $m/z$ : 301  $[\text{M}^++1]$ .

**Table 2, Entry 15: 2-(4-Bromo-2,6-dimethylphenyl)-5-fluoro-2*H*-indazole:**

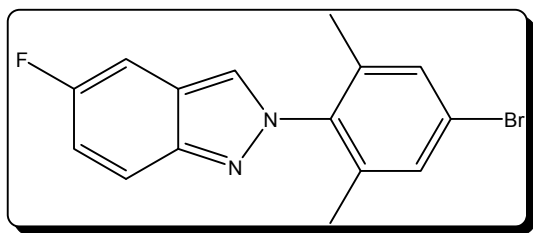

$^1\text{H}$  NMR ( $\text{CDCl}_3$ ):  $\delta$  8.52 (d,  $J = 2.26$  Hz, 1H), 7.98-7.94 (m, 1H), 7.64-7.57 (m, 2H), 7.24-7.21 (m, 2H), 2.13 (s, 6H);  $^{13}\text{C}$  NMR ( $\text{CDCl}_3$ ):  $\delta$  161.5, 149.4, 138.8, 134.6, 134.5, 131.4, 130.7, 129.2, 120.2, 119.9, 116.9, 115.4, 115.1, 18.2; IR

(KBr)  $\nu$  2923, 2855, 1522, 1459, 1375, 1244, 910, 724, 628, 520  $\text{cm}^{-1}$ ; MS (ESI)  $m/z$ : 319  $[\text{M}^++1]$ .

## 5. $^1\text{H}$ NMR and $^{13}\text{C}$ NMR spectra of isolated compounds

Table 2, Entry 1: 2-Phenyl-2*H*-indazole:

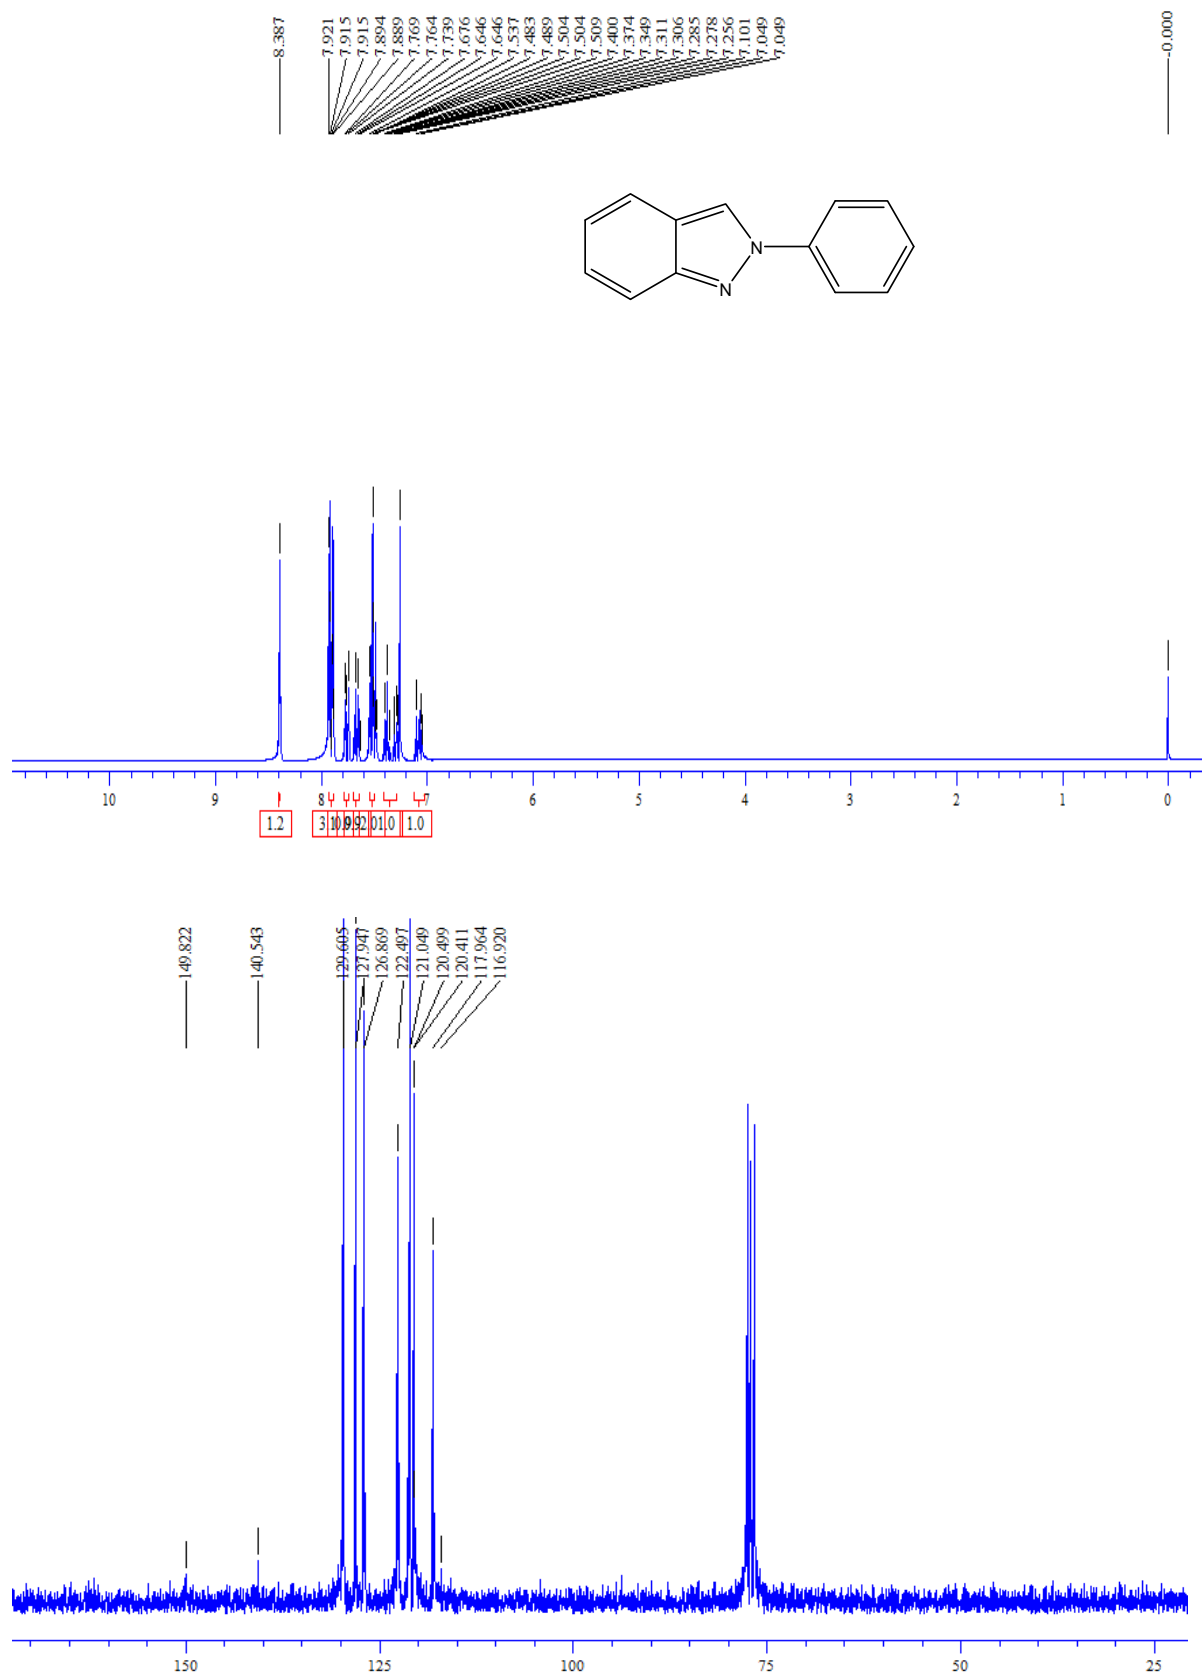

**Table 2, Entry 2: 2-(Pyridine-3-yl)-2H-indazole:**

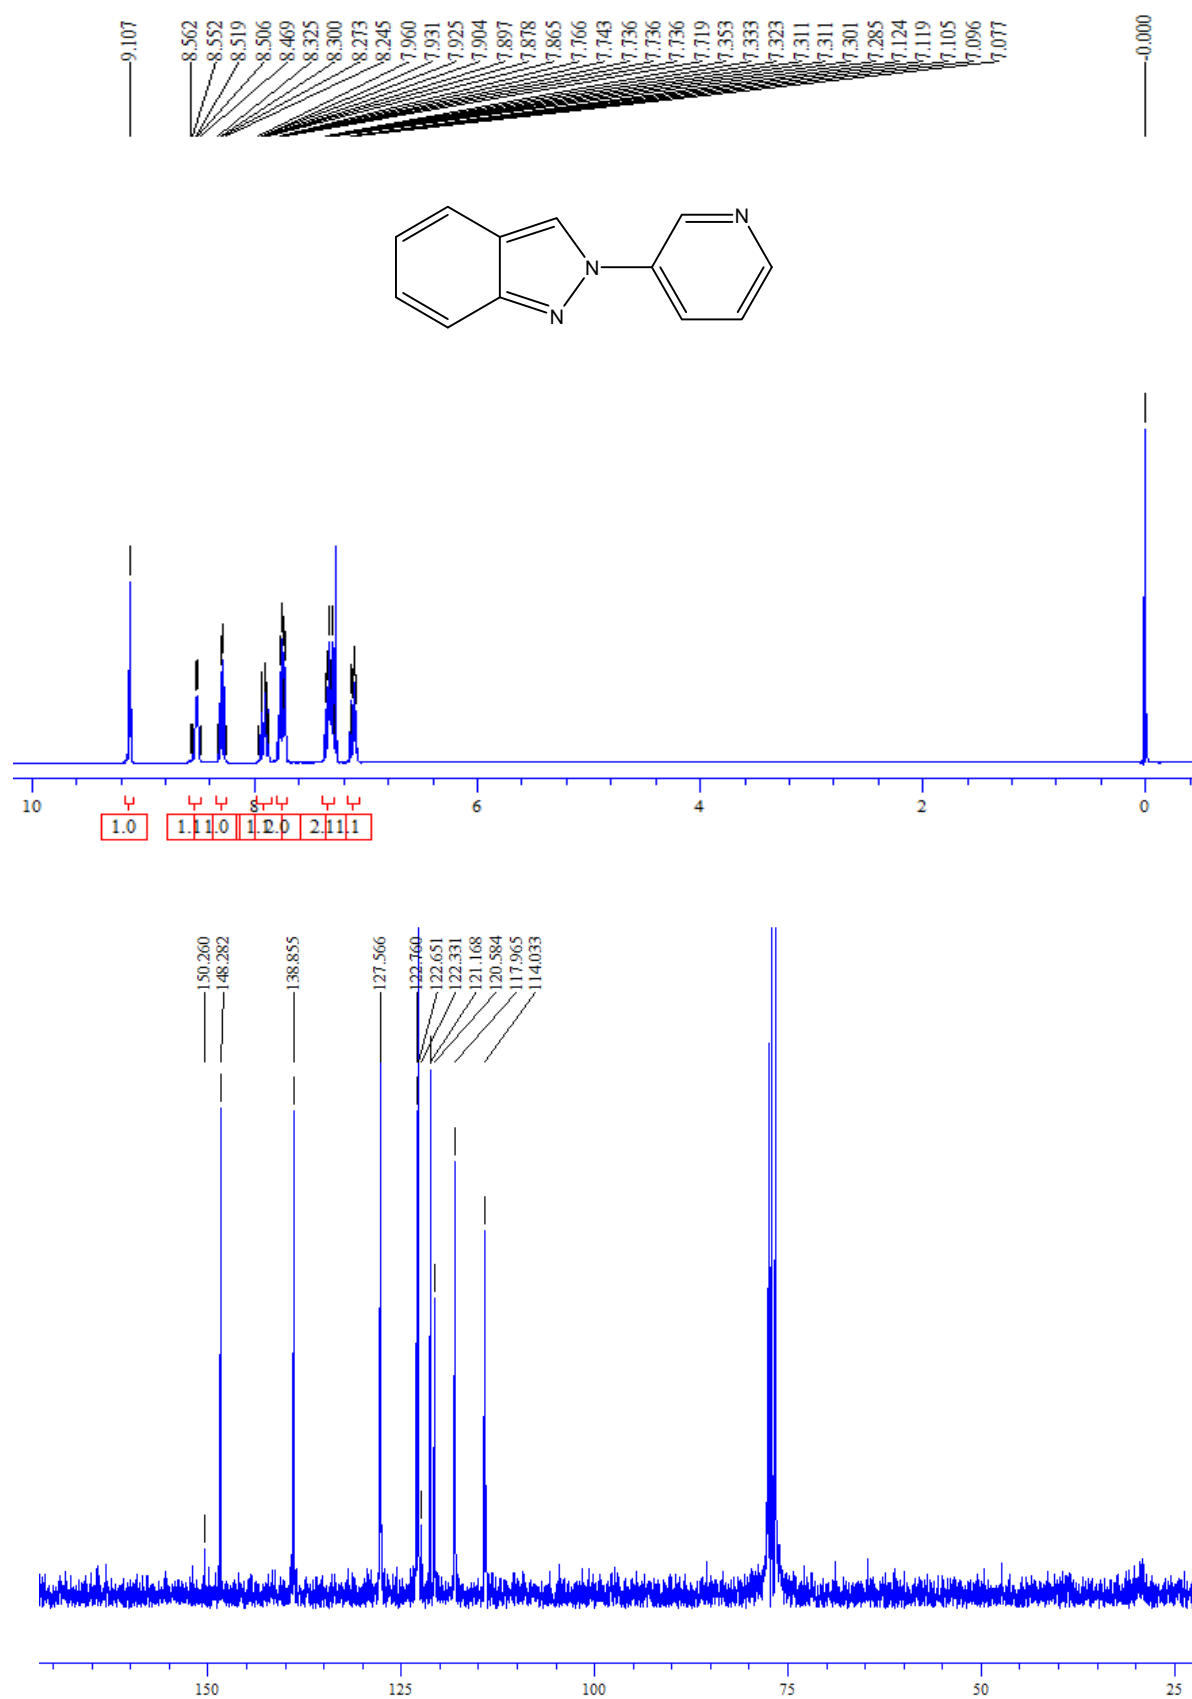

**Table 2, Entry 3: 2-(3,4-Dimethylphenyl)-2H-indazole:**

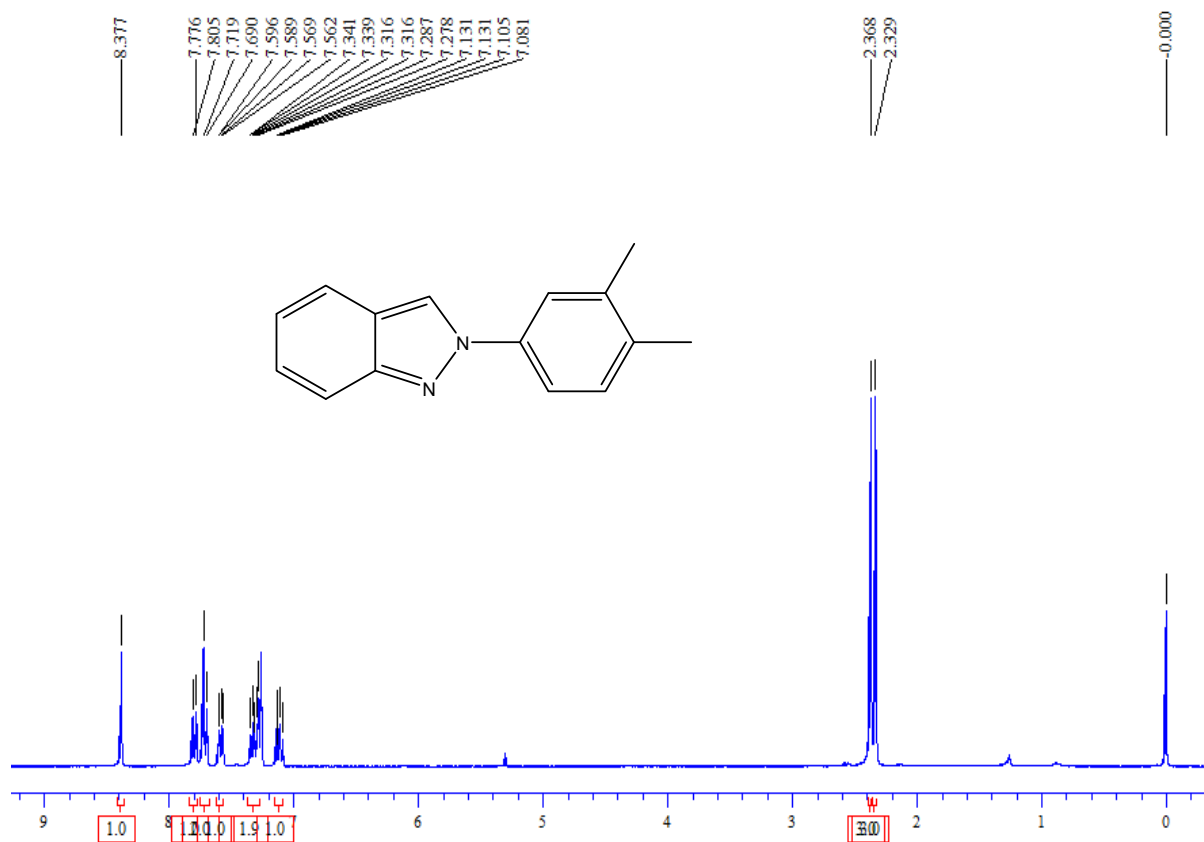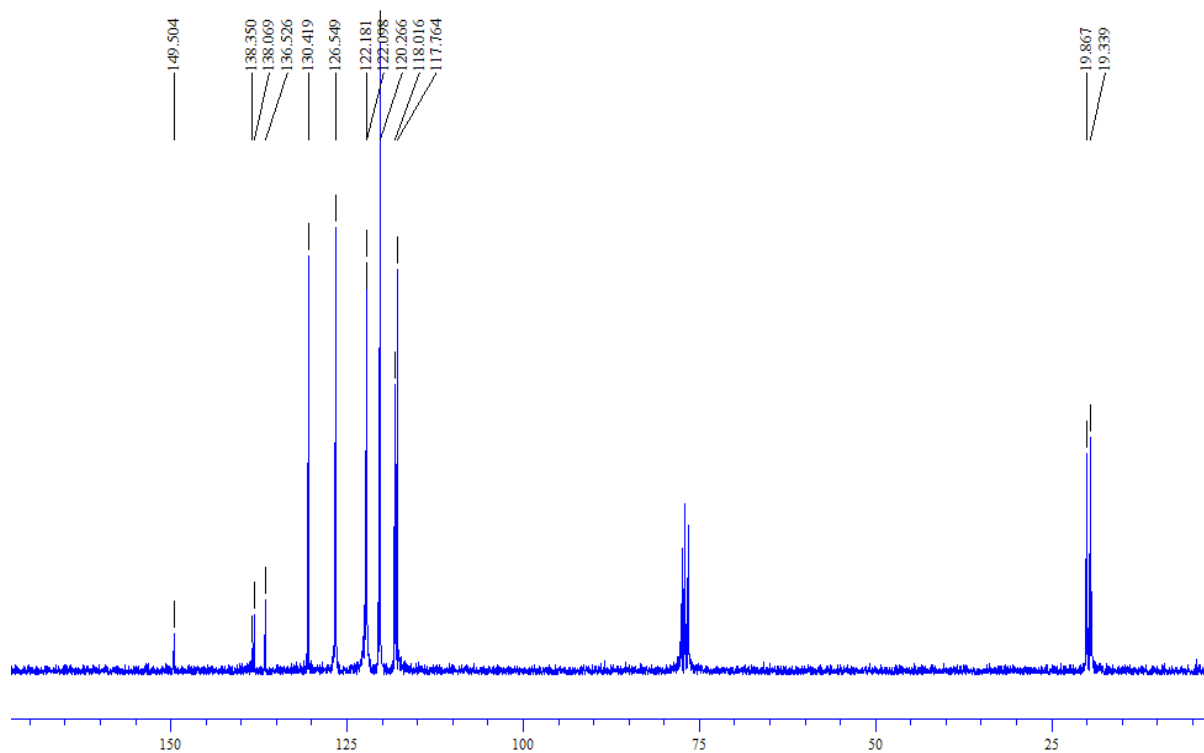

**Table 2, Entry 4: 2-*p*-Tolyl-2*H*-indazole:**

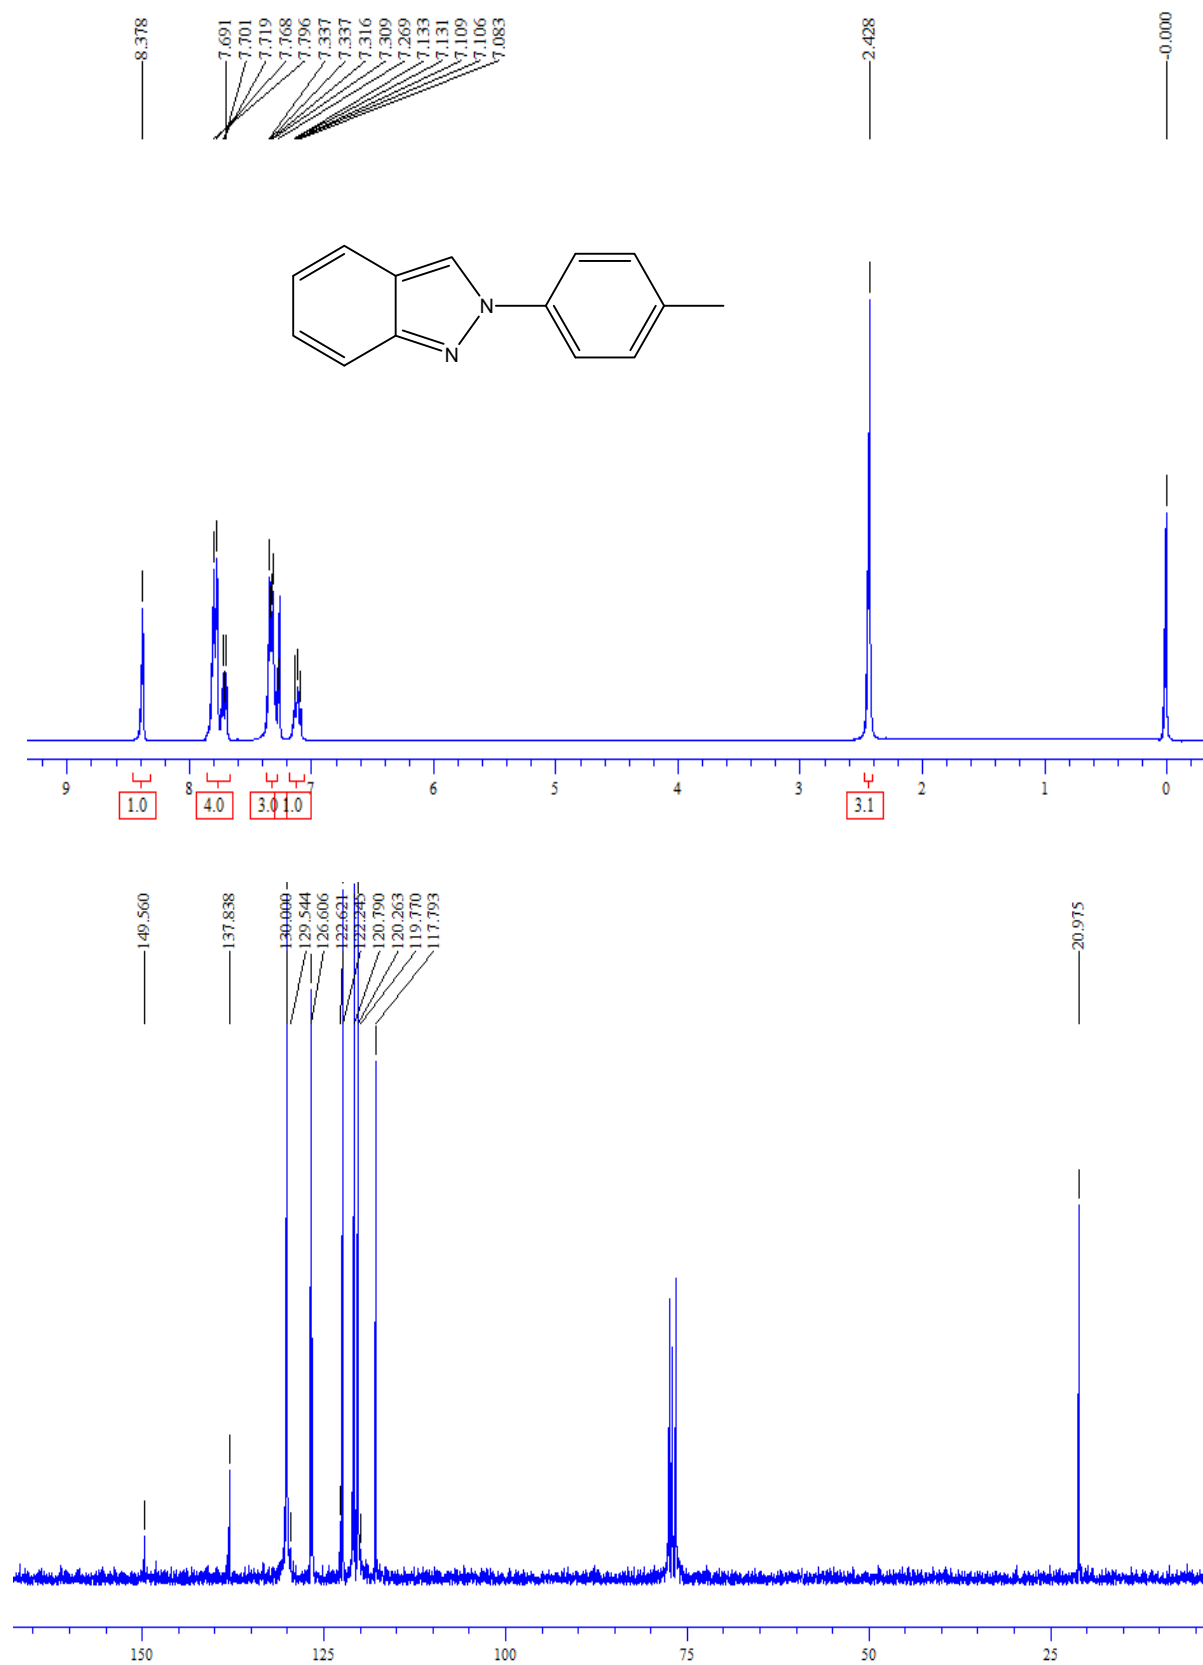

**Table 2, Entry 5: 2-(4-Methoxy-2-nitrophenyl)-2H-indazole:**

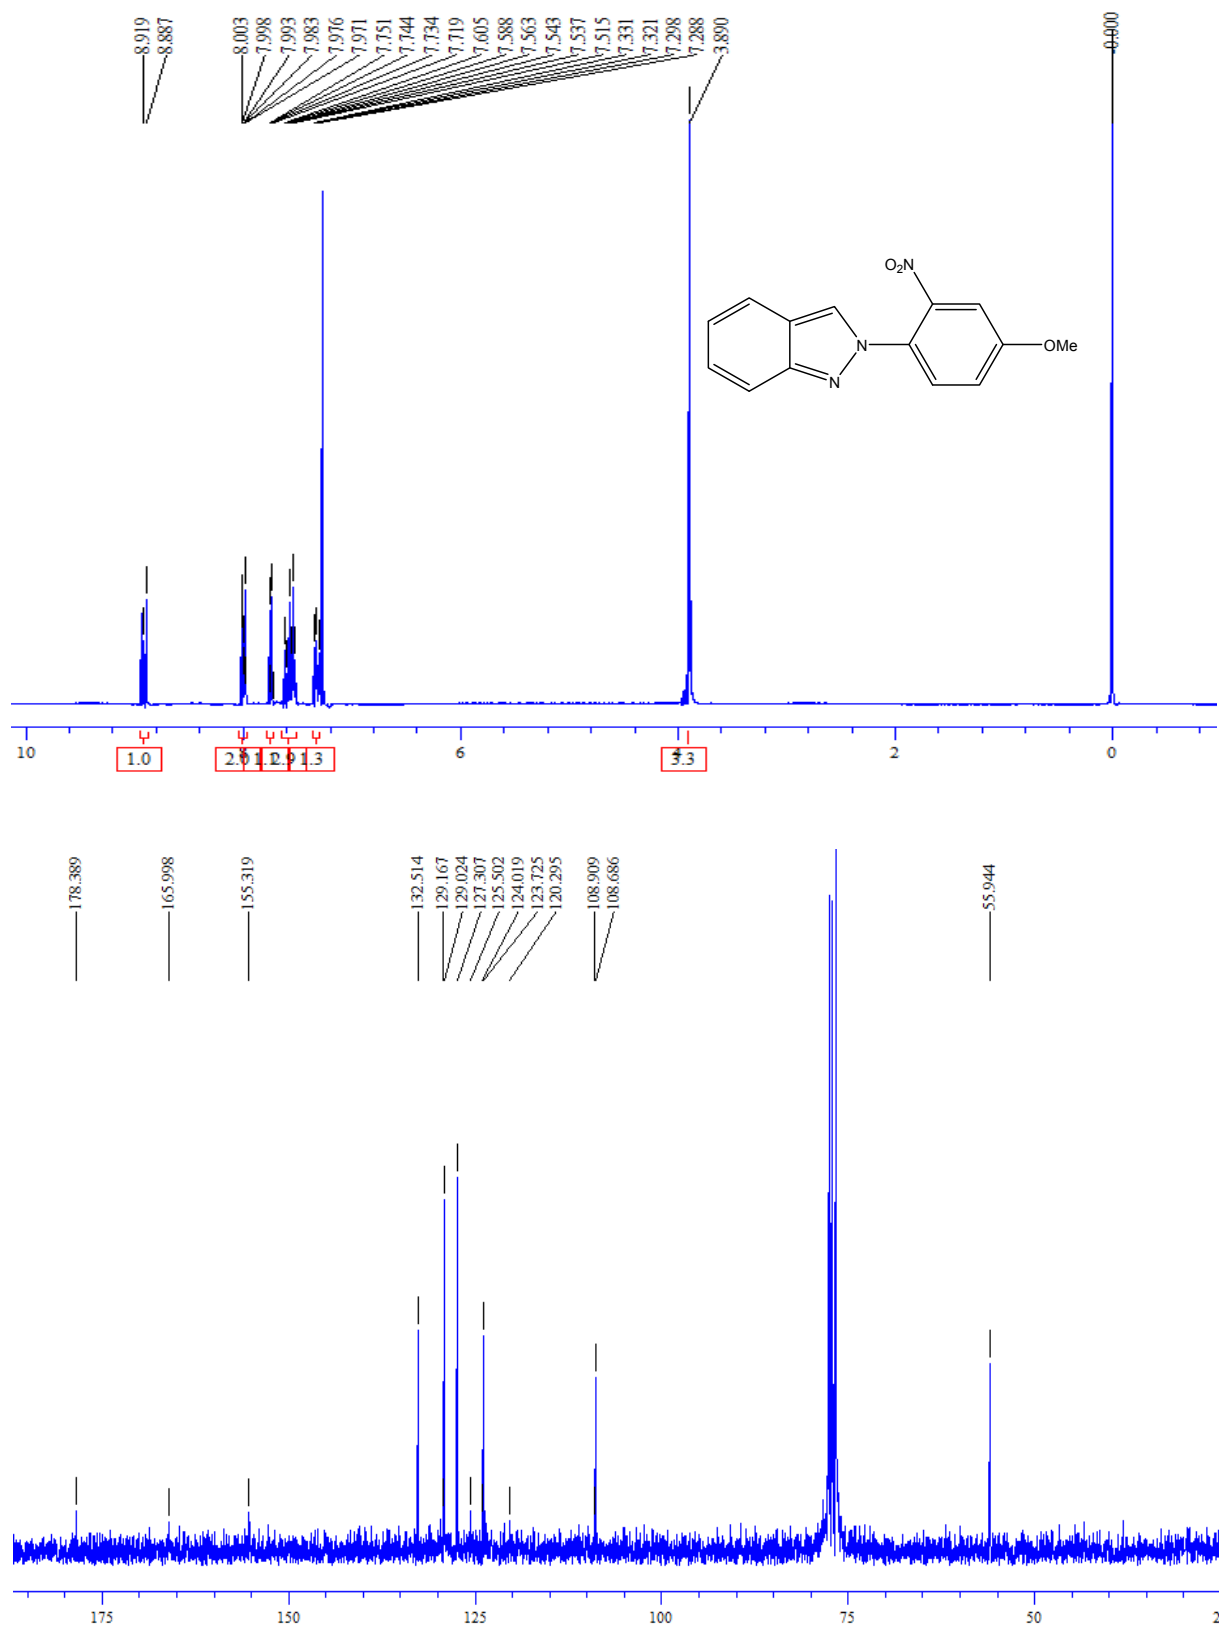



**Table 2, Entry 6: 2-(4-Methoxyphenyl)-2*H*-indazole:**

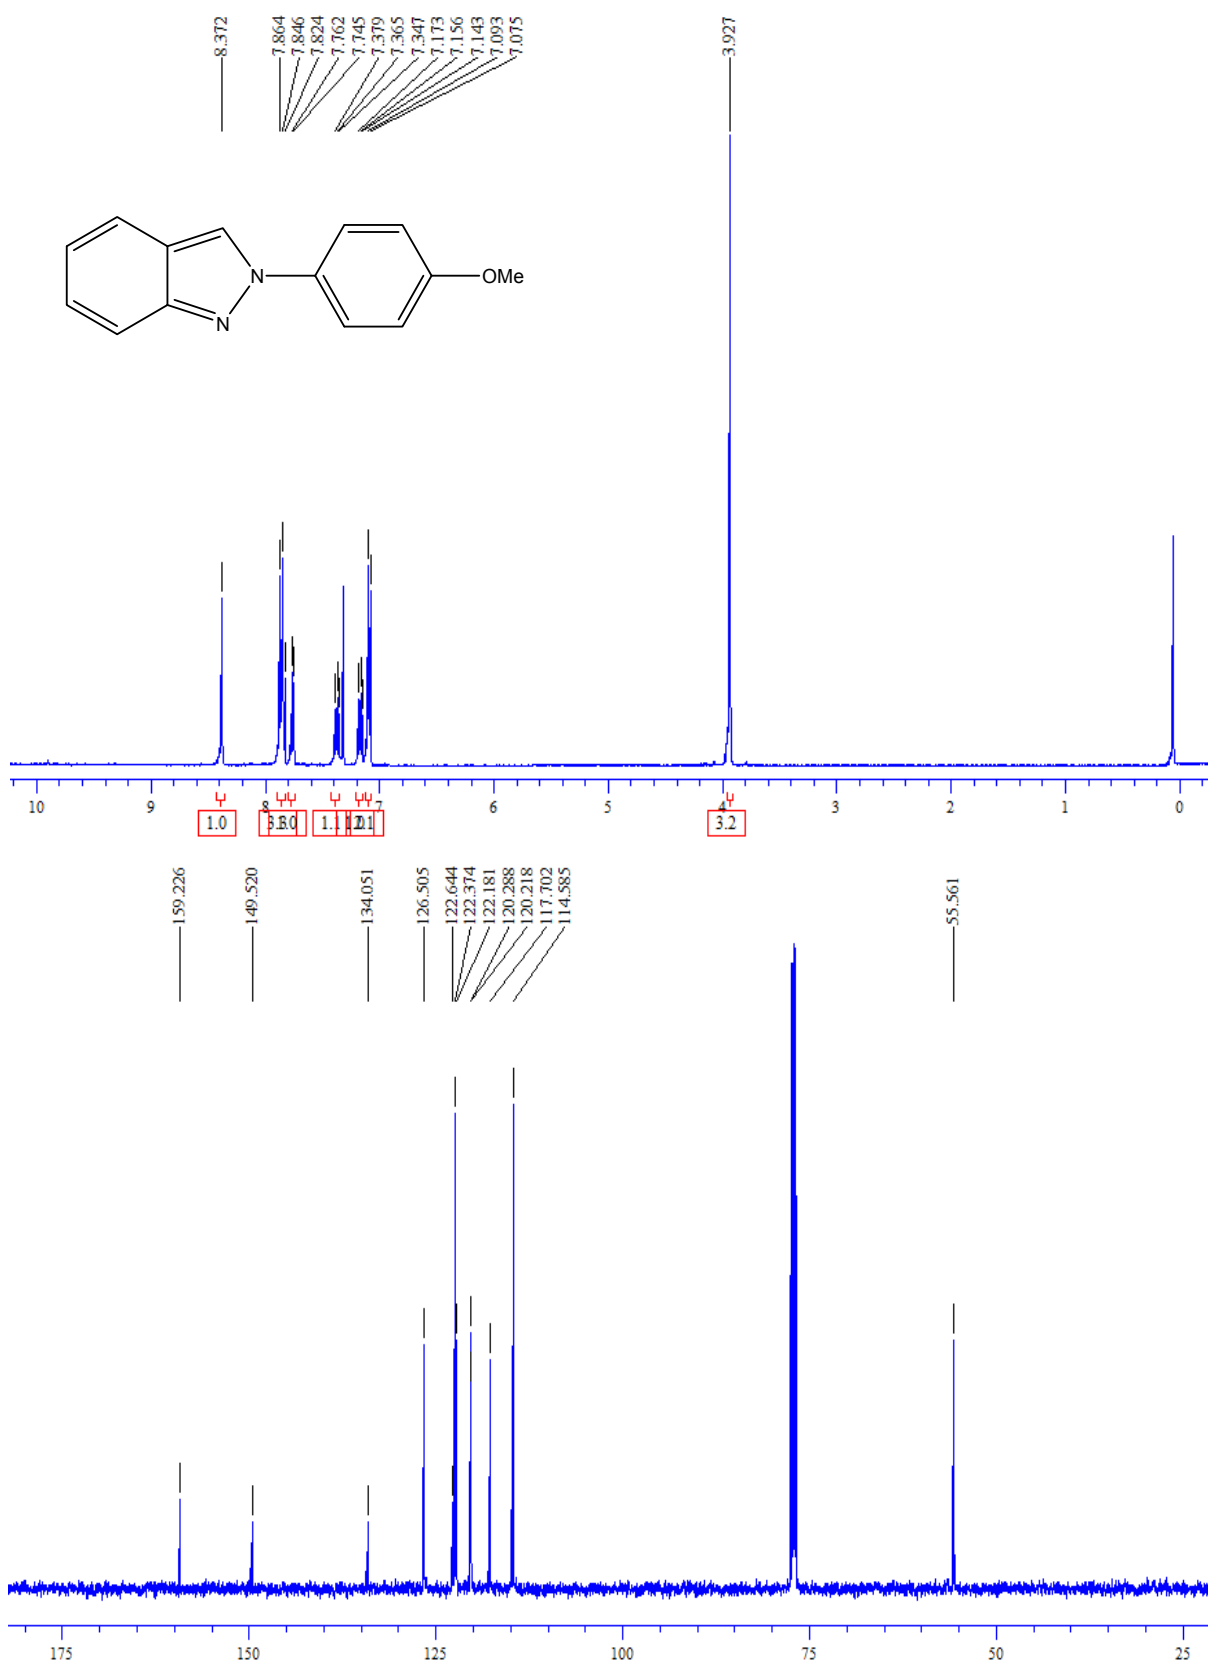

**Table 2, Entry 7: 2-(2-Chlorophenyl)-2H-indazole:**

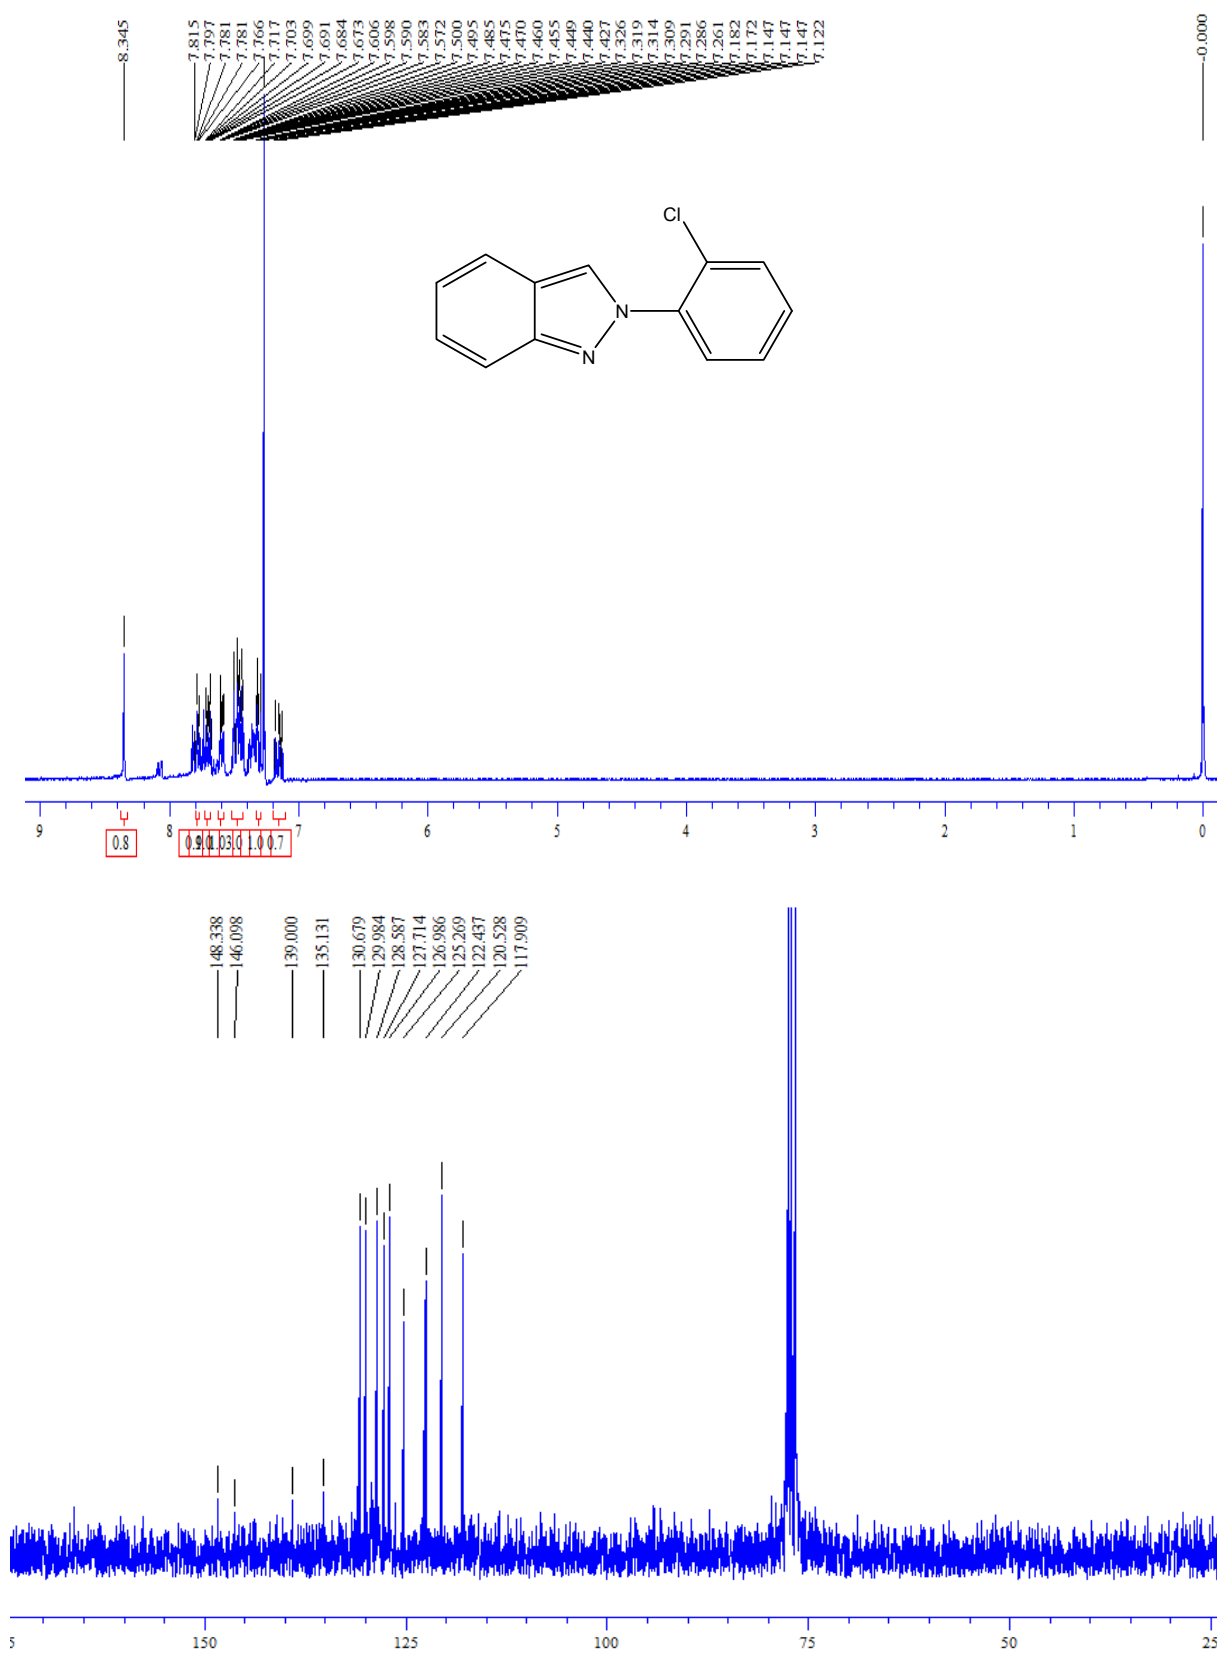

**Table 2, Entry 8: 2-(4-Bromophenyl)-2H-indazole:**

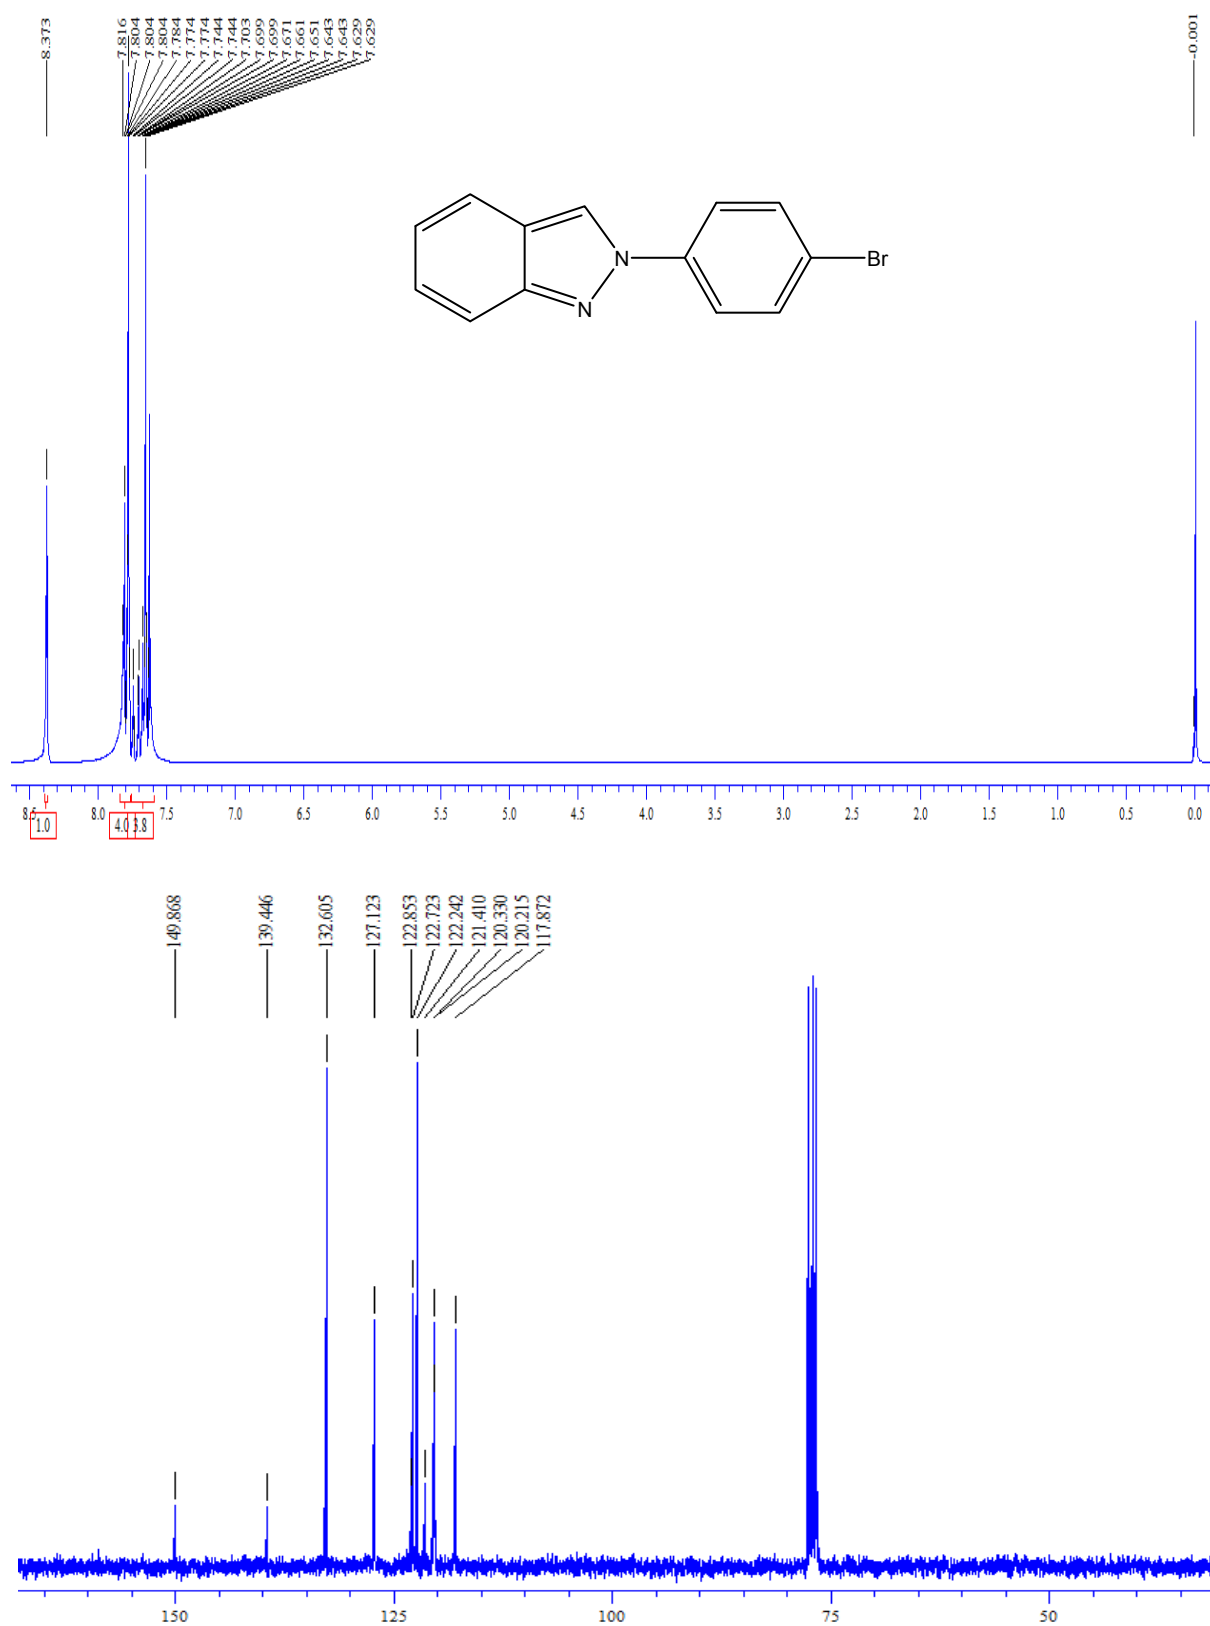

**Table 2, Entry 9: 5-Fluoro-2-(3,4-dimethylphenyl)-2H-indazole:**

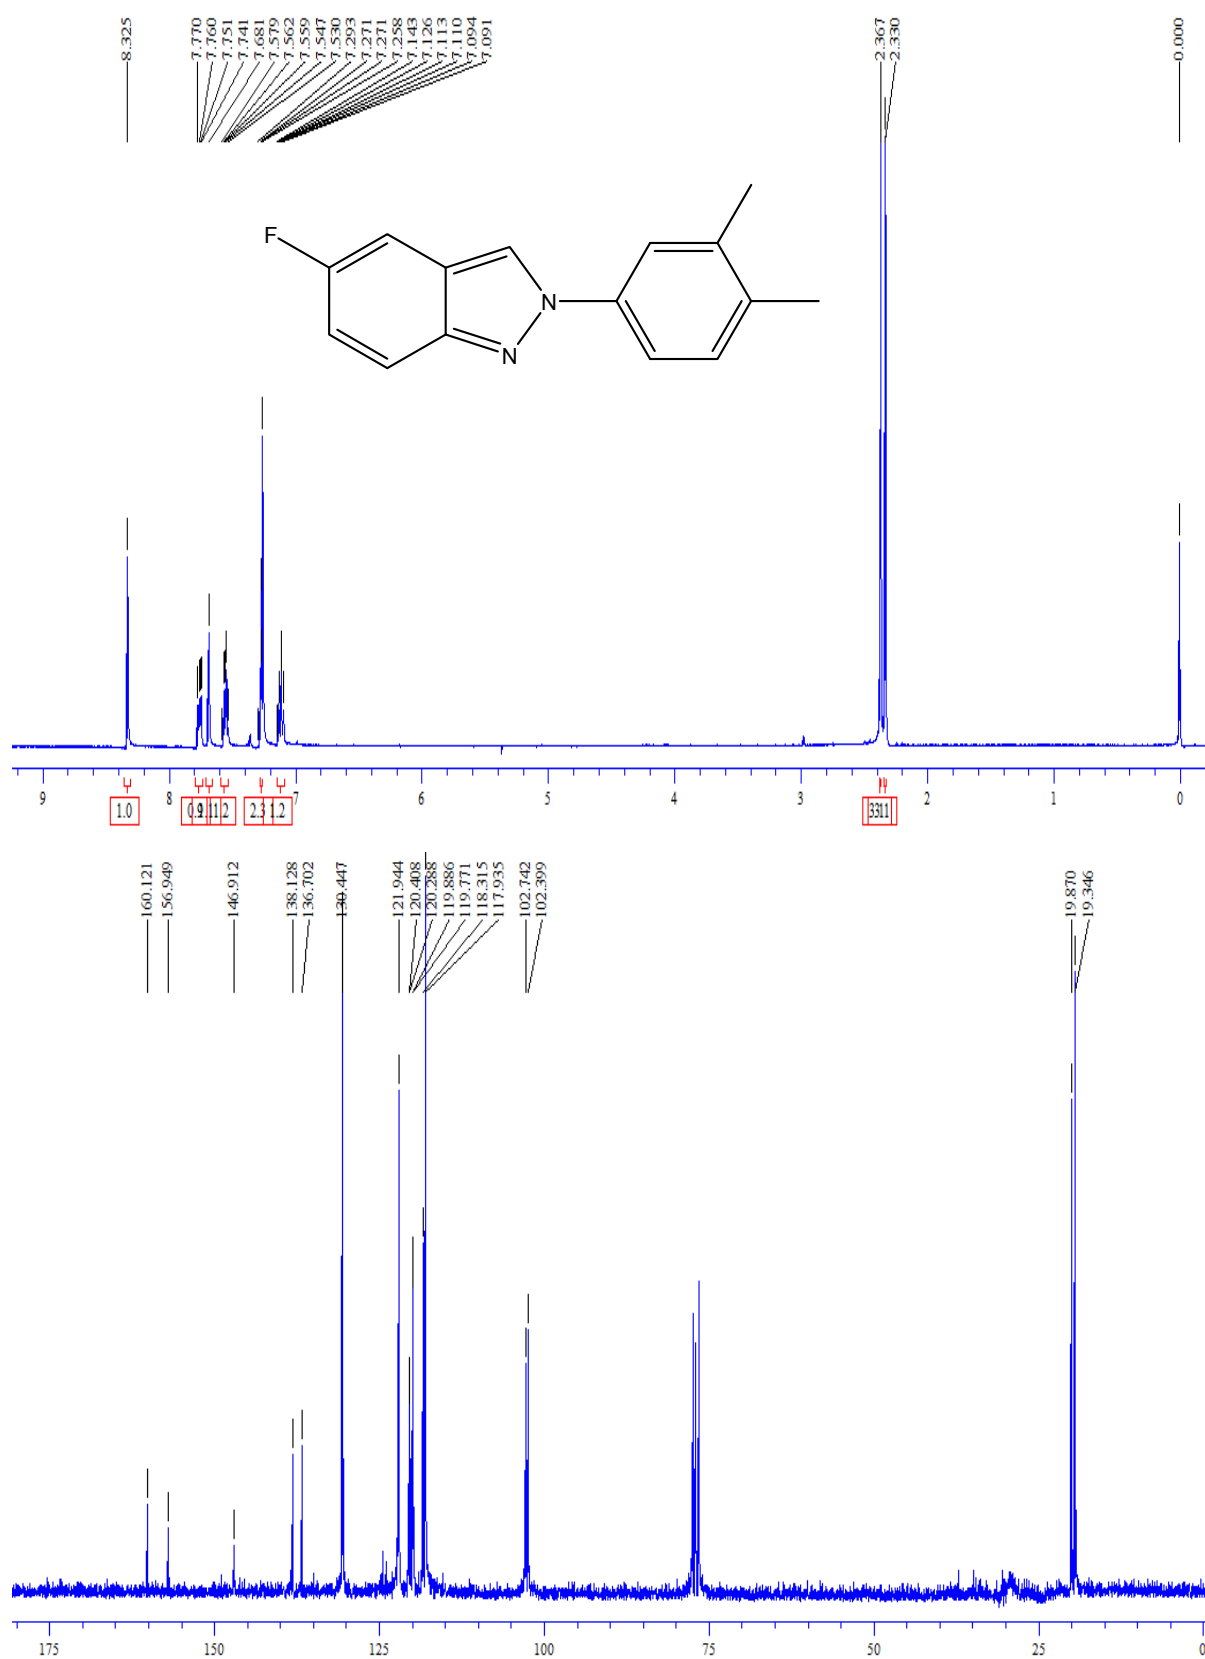

**Table 2, Entry 10: 2-(2-Methoxy-4-methylphenyl)-2*H*-indazole:**

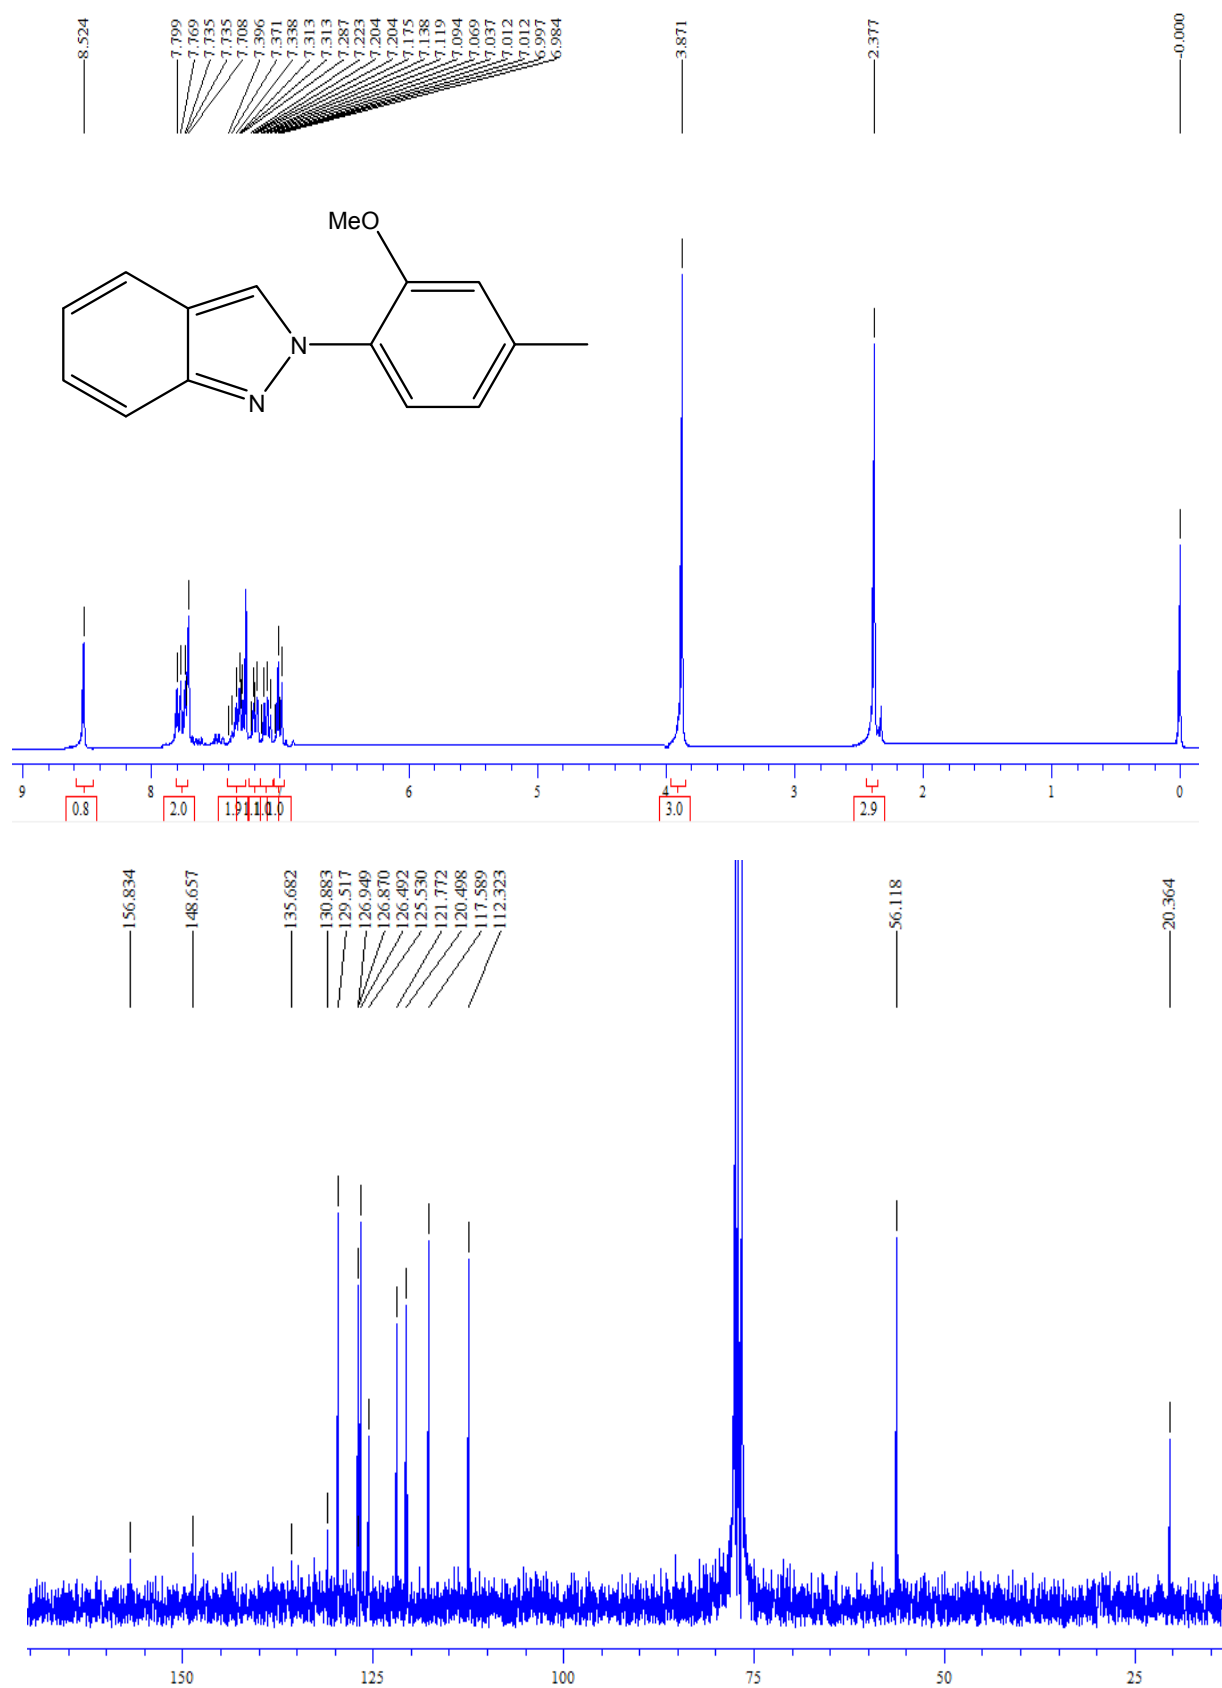

**Table 2, Entry 11: 5-Fluoro-2-phenyl-2H-indazole:**

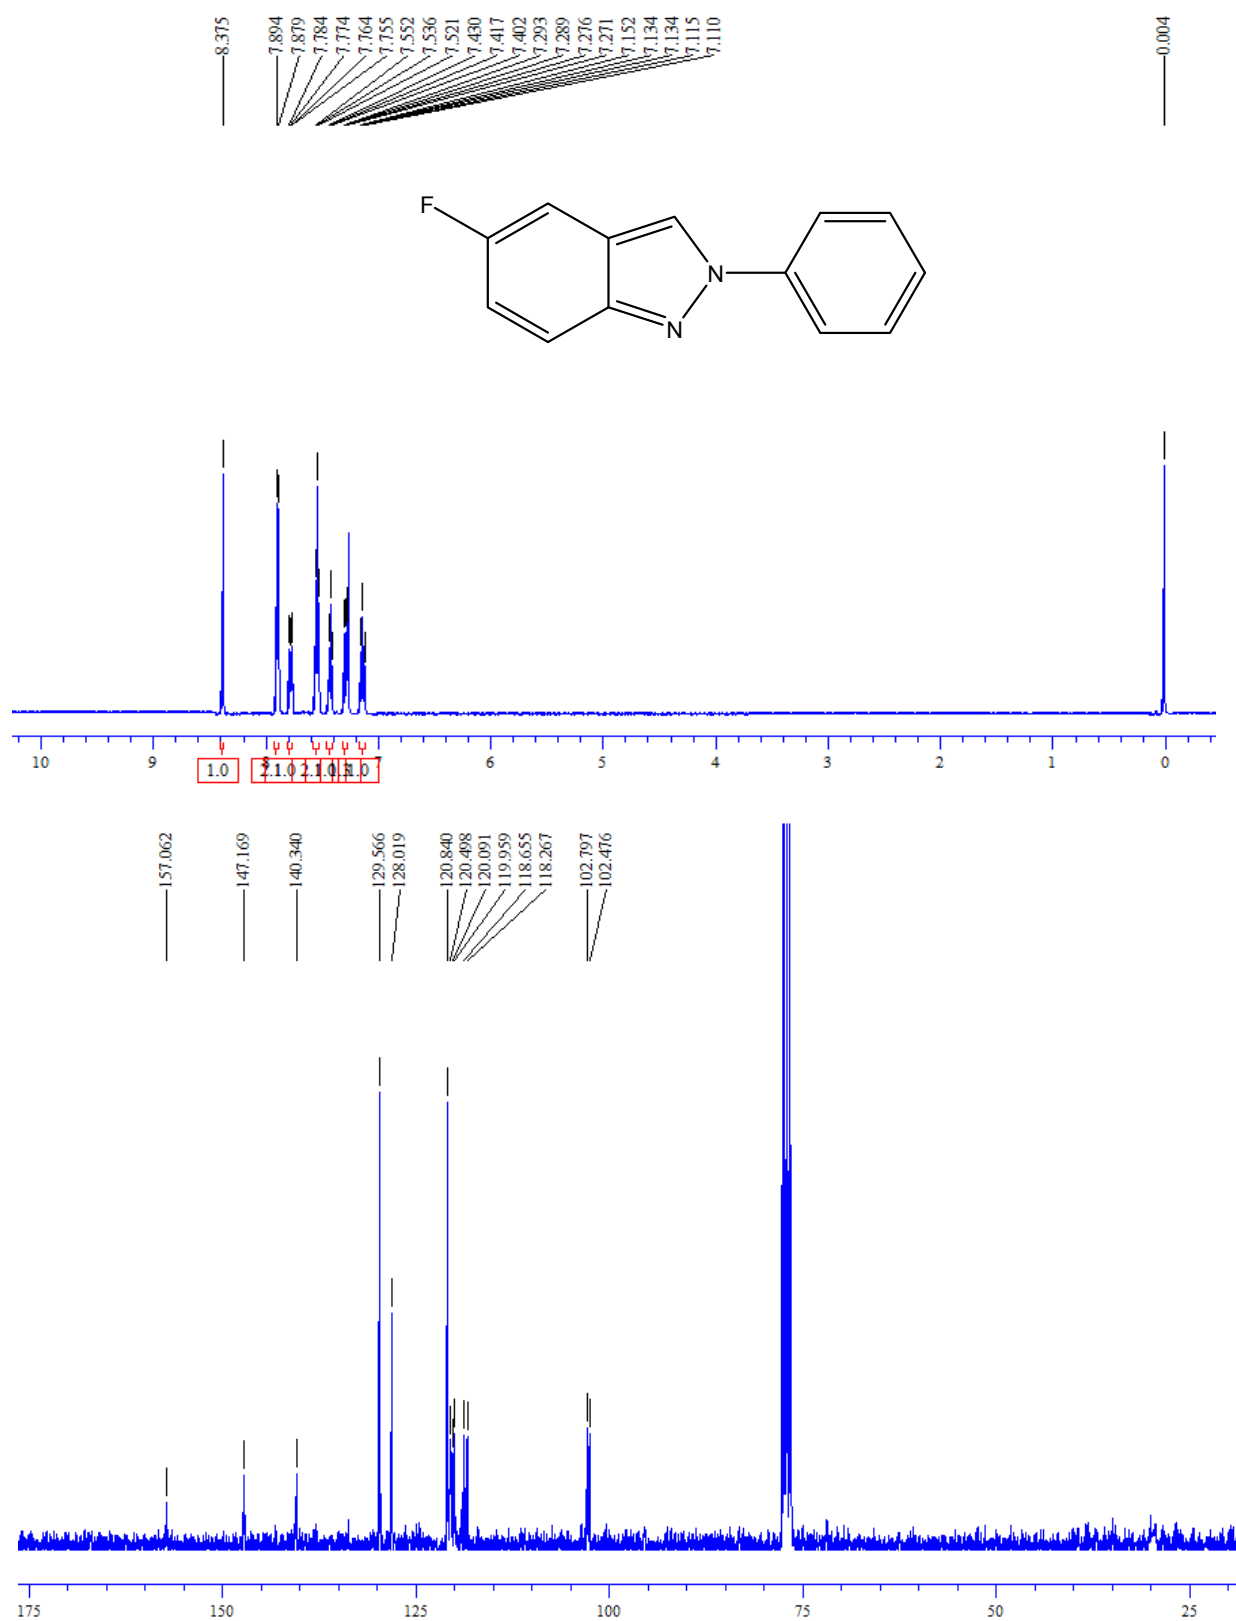

**Table 2, Entry 12: 5-Fluoro-2-(adamantyl)-1H-indazole:**

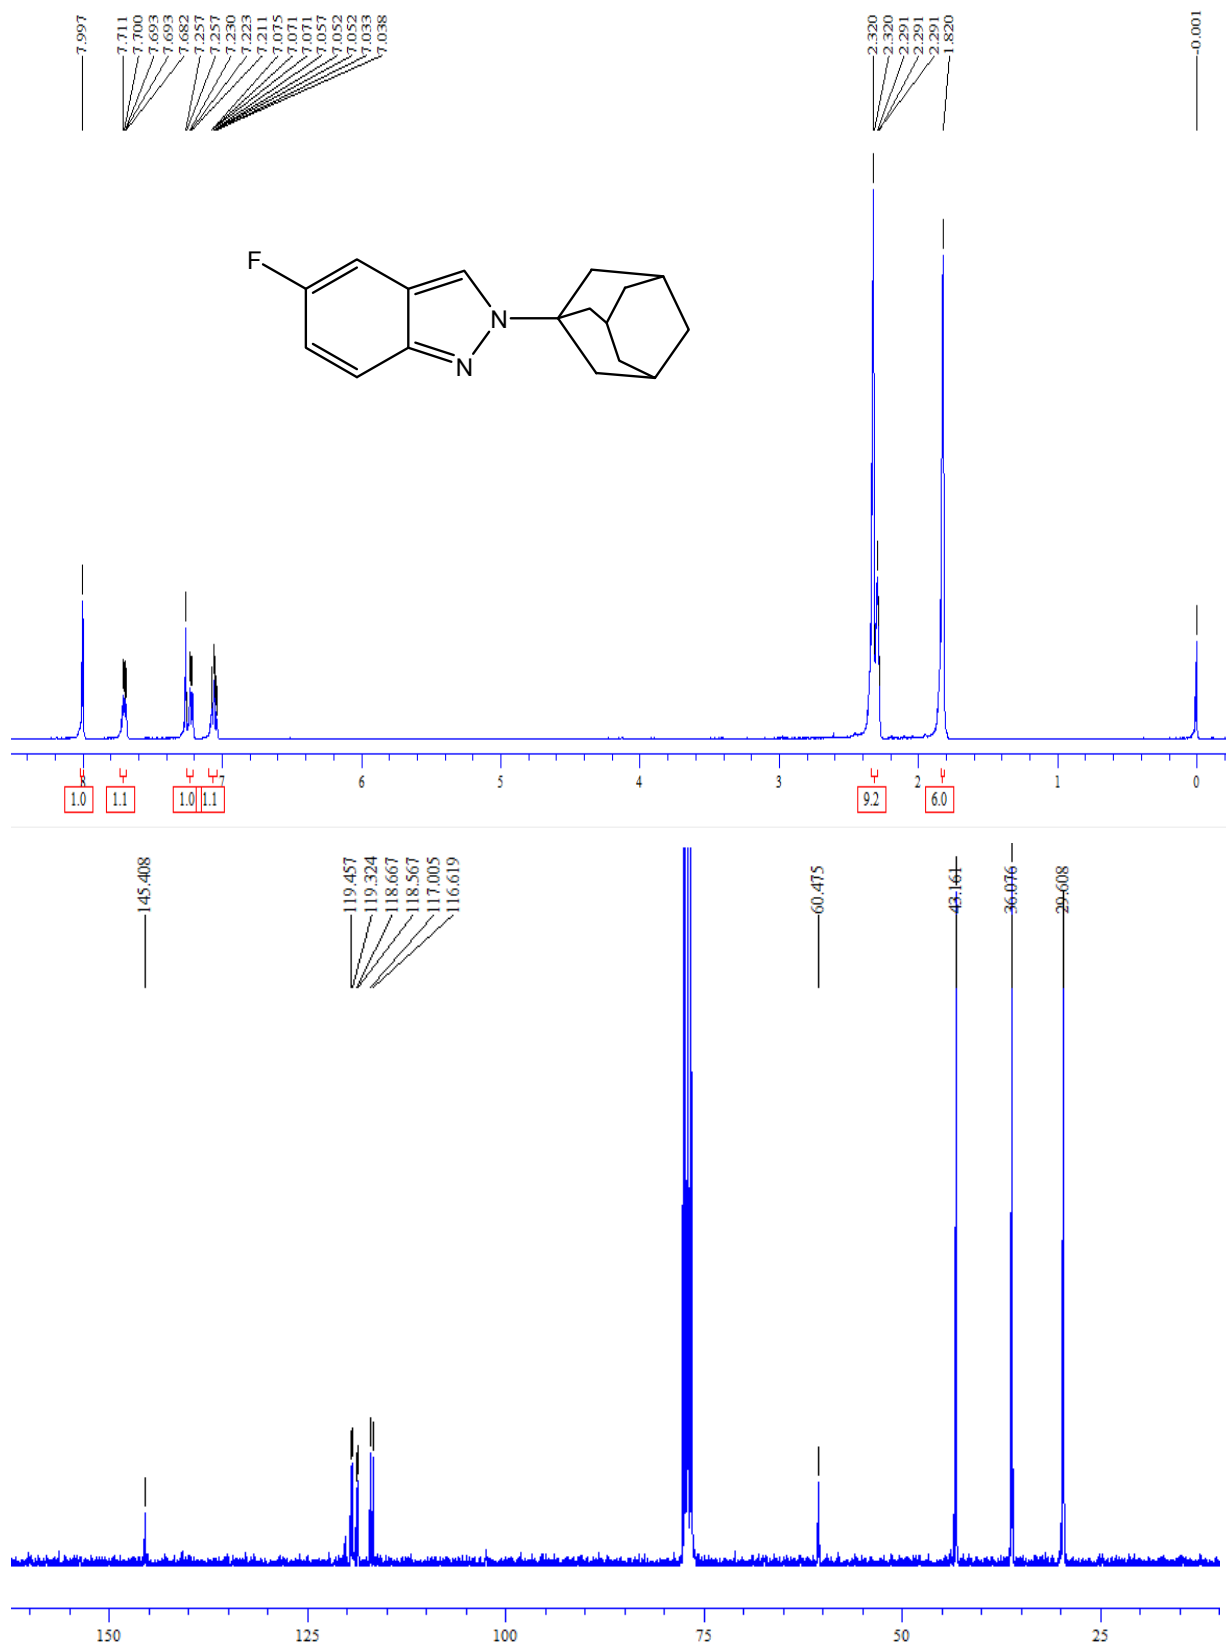

**Table 2, Entry 13: 2-Adamantyl-2H-indazole:**

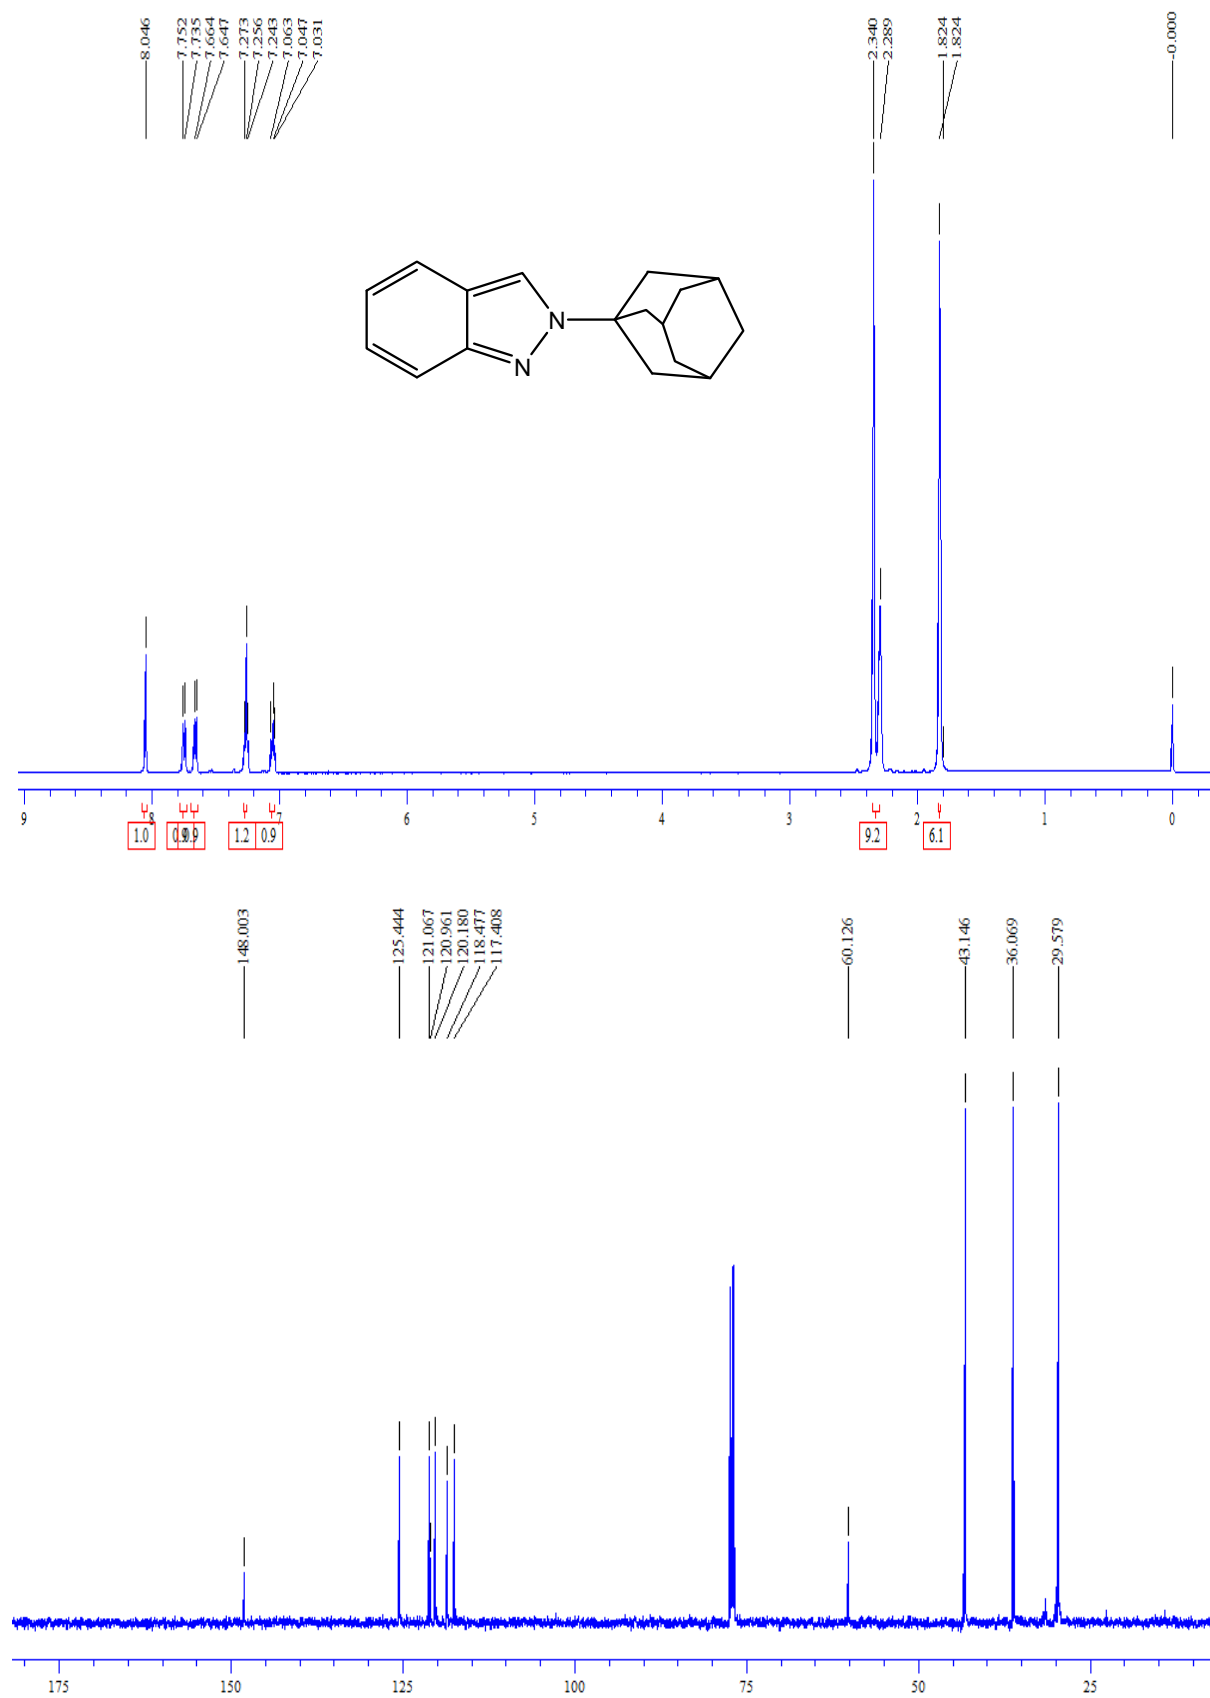



Table 2, Entry 14: 2-(4-Bromo-2,6-dimethylphenyl)-2*H*-indazole:

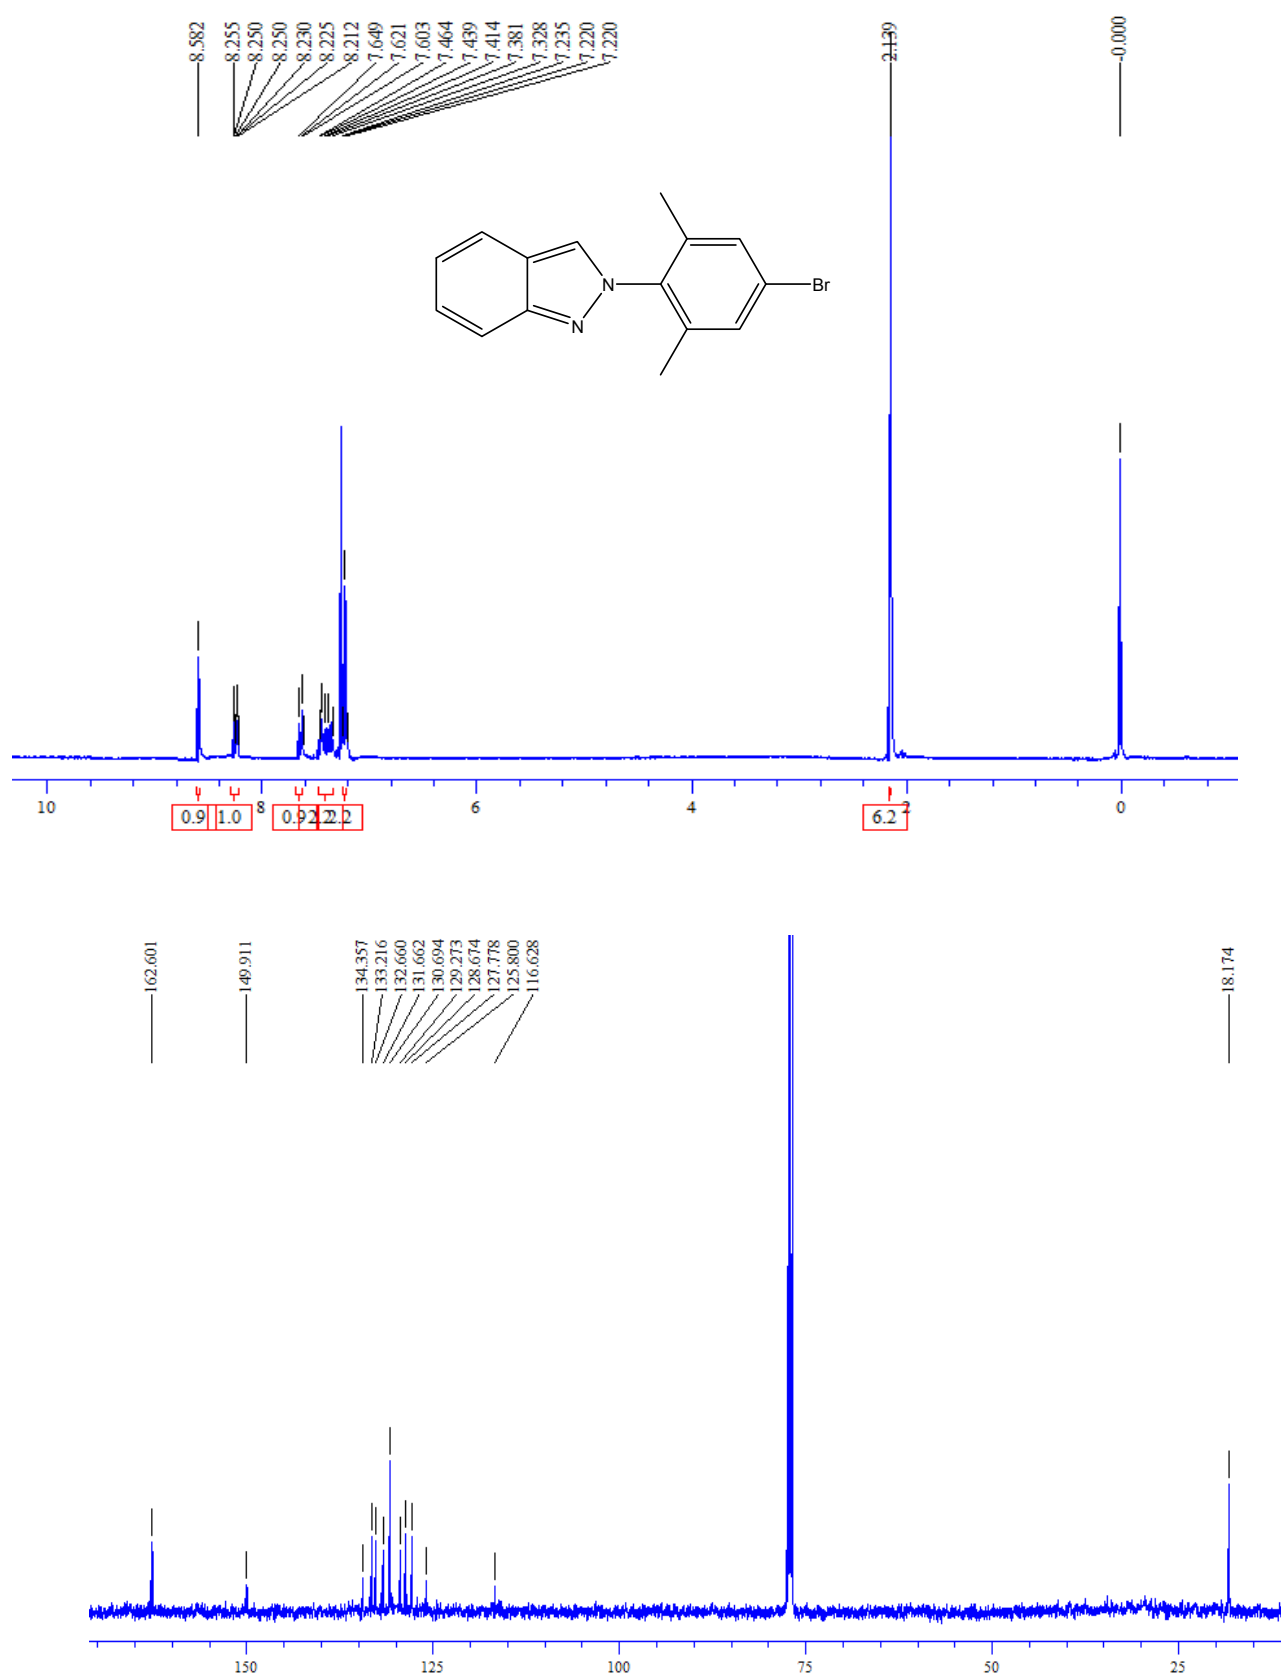

**Table 2, Entry 15: 2-(4-Bromo-2,6-dimethylphenyl)-5-fluoro-2H-indazole:**

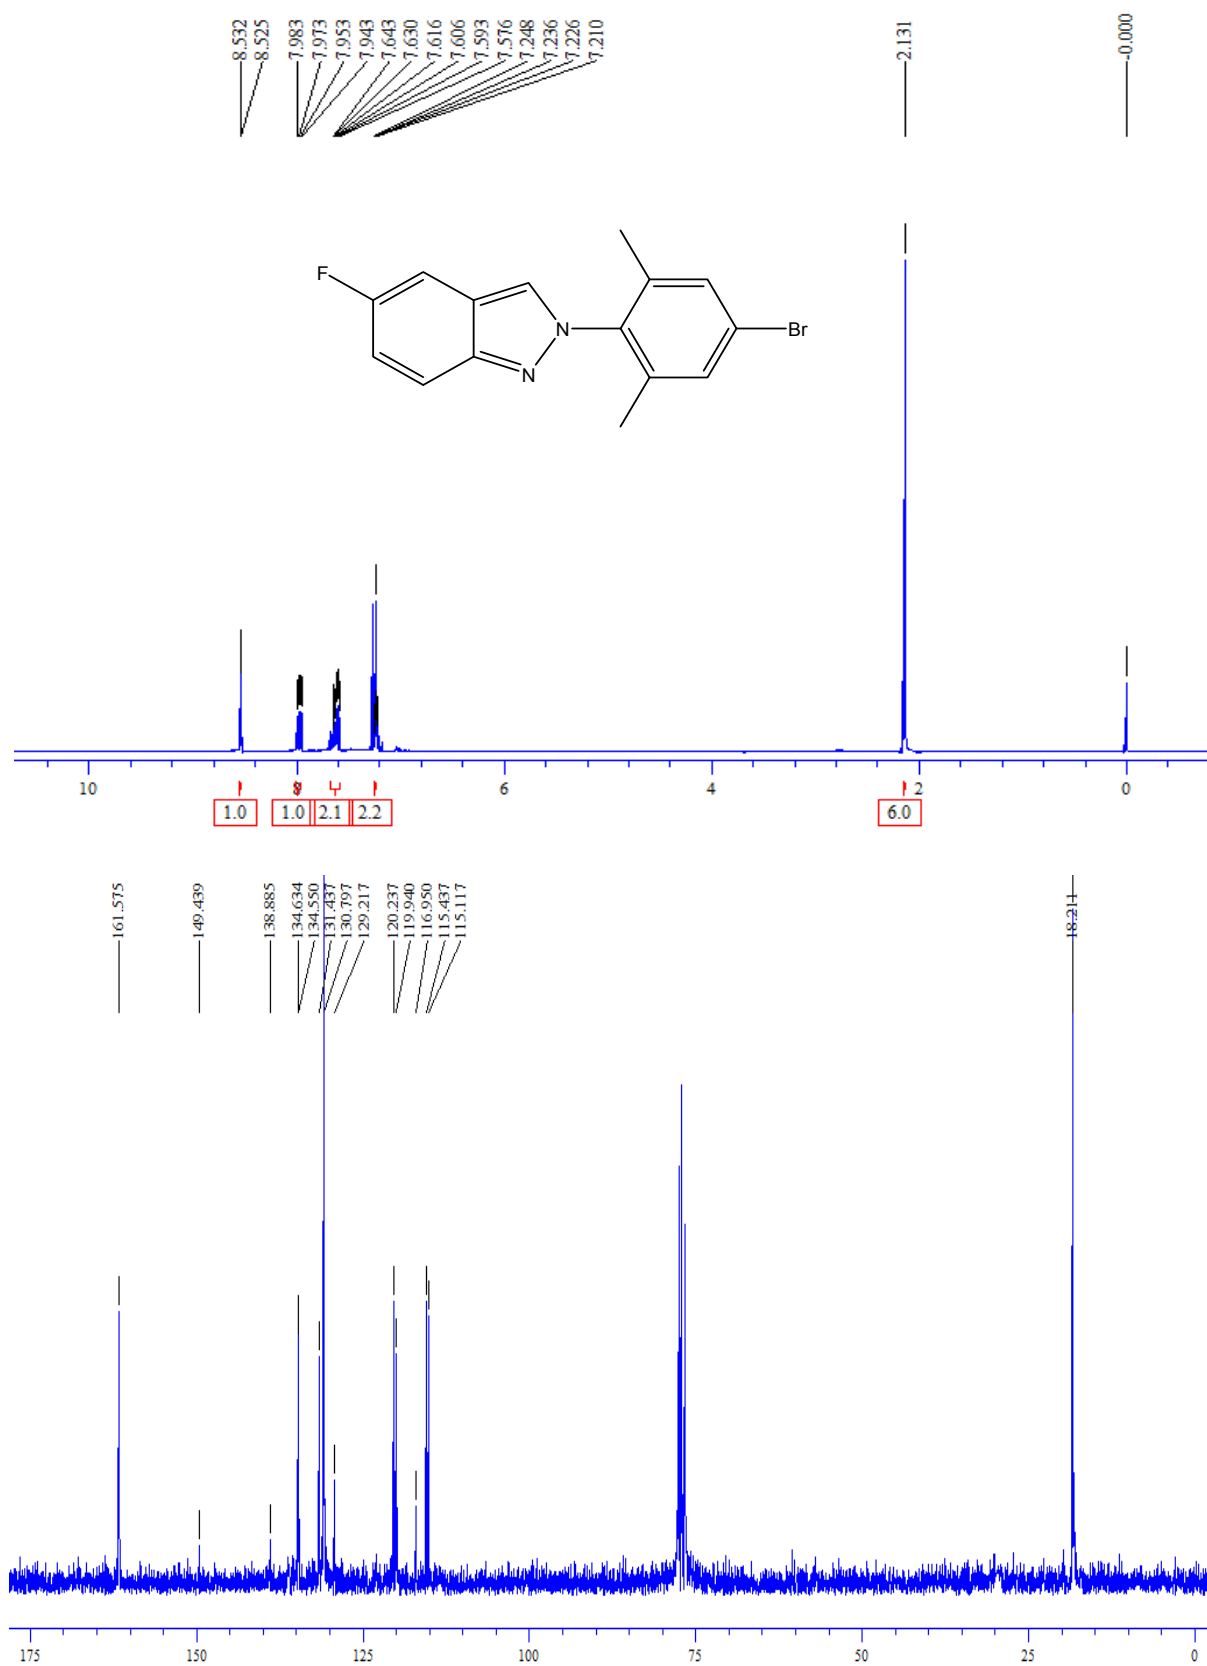

Supplement: c2cy20590d.pdf [file c2cy20590d.pdf]
